# Supplementary material for: Reusable cobalt-phthalocyanine in water: efficient catalytic aerobic oxidative coupling of thiols to construct S–N/S–S bonds
Source: Royal Society of Chemistry journal article supplement (doi:10.1039/c7gc00401j), 2017-01-01

## ***Supporting information***

### **Reusable Cobalt-Phthalocyanine in Water: Efficient Catalytic Aerobic Oxidative Coupling of Thiols to Construct S-N/S-S Bonds**

Yingchao Dou, Xin Huang, Hao Wang, Liting Yang, Heng Li, Bingxin  
Yuan\* and Guanyu Yang

# Table of contents

**(A) General information    S3**

**(B) Typical experimental procedure    S4-S5**

**(C)  $^1\text{H}$  and  $^{13}\text{C}$  NMR spectra data of all products    S6-S16**

**(D) References.    S17**

**(E) Copies of all spectra    S18-S52**

#### **(A) General information:**

All thiols and amine reagents used are commercial available, without further purification unless noted. All reactions were carried out in water and oxygen atmosphere or air atmosphere, monitored by thin layer chromatography (TLC). All products were purified by flash chromatography on silica gel. The chemical yields referred are isolated products.  $^1\text{H}$  NMR and  $^{13}\text{C}$  NMR spectra were recorded on 600 MHz Bruker spectrometers (600 MHz for  $^1\text{H}$  NMR and 150 MHz for  $^{13}\text{C}$  NMR) and 400 MHz Bruker spectrometers (400 MHz for  $^1\text{H}$  NMR and 100 MHz for  $^{13}\text{C}$  NMR). Chemical shifts of  $^1\text{H}$  were reported in part per million relative to the  $\text{CDCl}_3$  residual peak ( $\delta$  7.26) or the  $\text{DMSO-d}_6$  residual peak ( $\delta$  2.50). Chemical shifts of  $^{13}\text{C}$  NMR were reported relative to  $\text{CDCl}_3$  ( $\delta$  77.0) or  $\text{DMSO-d}_6$  ( $\delta$  39.5). The used abbreviations are as follows: s(singlet), d (doublet), t (triplet), q(quartet), m (multiplet), br(broad). High resolution mass spectra (HRMS) data were measured on a MALDI-FTMS by means of the ESI technique, with accurate masses reported for the molecular ion  $[\text{M}+\text{H}]^+$ . The Low resolution mass spectra (LRMS) were performed on the SHIMADZU GCMS-QP 2010 Plus mass spectrometer (Kyoto, Japan) by means of EI technique. The melting points of these compounds were determined by an X-4 micro-melting point apparatus (Beijing, China).

## (B) Typical experimental procedures

1). Condition 1: (compounds **3a-3o**): To a reactor (70 mL) was added 2-mercaptobenzothiazole (2 mmol), 0.8 wt% Co catalyst, 10 mL water. The amine was finally added to the reaction mixture under stirring at room temperature. The reactor was charged with oxygen atmosphere up to 0.3 MPa three times. Subsequently, the reactor was stirred under 0.3 MPa O<sub>2</sub> at 60 °C for 4 h. After cooling to room temperature, the reaction mixture was filtered and washed with 1 mL water. The filter cake was dried and the desired product was obtained through flash chromatography on silica gel with ethyl acetate/hexane (1/10) as eluent. The filtrate was extracted with ethyl acetate (30 mL×3). The combined organic extract phase was dried over Na<sub>2</sub>SO<sub>4</sub>, and after filtration, the solvent was removed on rotovap under reduced pressure. The resulting residue was purified by flash chromatography on silica gel to give the isolated product with ethyl acetate/hexane (1/10) as eluent. The yield of desired product was calculated by combination of the obtained two parts.

2). Condition 2: (**4a**, **4m**, **4n**): To a reactor (70 mL) was added thiol (2 mmol), 0.8 wt% Co catalyst and 10 mL water. The reactor was charged with oxygen up to 0.3 MPa three times. Subsequently, the reaction mixture was stirred under 0.3 MPa O<sub>2</sub> at 60 °C for 4 h. (**4a**) After cooling to room temperature, the reaction mixture was filtered and washed with 1 mL water. The filter cake was dried and the desired product was obtained. (**4m**, **4n**) After cooling to room temperature, 10 mL water was added to the reaction mixture and extracted with ethyl acetate (30 mL×3). The combined organic extract phase was dried over Na<sub>2</sub>SO<sub>4</sub>, and the solvent was removed on rotovap under reduced pressure. The resulting residue was purified by flash chromatography on silica gel to give the desired product.

Condition 3: (compounds **4b-4l**): To a Schlenk tube (50 mL) was added thiol (2 mmol), Co catalyst (0.8 wt%), and water (10 mL). Subsequently, the reaction mixture was stirred under air atmosphere at 60 °C and monitored by thin layer chromatography (TLC) until the thiol was converted completely. After cooling to room temperature, 10 mL water was added to the reaction mixture and extracted with ethyl acetate (30 mL×3). The combined organic extract phase was dried over Na<sub>2</sub>SO<sub>4</sub>, and after filtration, the solvent was removed on rotovap under reduced pressure. The resulting residue was purified by flash chromatography on silica gel to give the desired product.

3) Condition 4: (compounds **5a-5d**) To a Schlenk tube (25 mL) were added thiols (**1A**, 1 mmol; **1B**, 5 mmol), Co catalyst (0.8 wt%, calculated with **1A**), and water (5 mL). Subsequently, the reaction mixture was stirred under O<sub>2</sub> atmosphere for 12 h at 60 °C and monitored by thin layer chromatography (TLC) until the thiol (**1A**) was converted completely. After cooling to room temperature, 10 mL water was added to

the reaction mixture and extracted with ethyl acetate (30 mL×3). The combined organic phase was dried over Na<sub>2</sub>SO<sub>4</sub>, and after filtration, the solvent was removed on rotovap under reduced pressure. The resulting residue was purified by flash chromatography on silica gel to give the desired product.

#### 4). Large-scale testing reaction.

Condition 5: To a reactor (200 mL) was added 2-mercaptobenzothiazole (10.02g, 60 mmol), Co catalyst (0.8wt%) and water (100 mL). *tert*-Butylamine (21.94g) was finally added to the reaction mixture under stirring at room temperature. The reactor was charged with oxygen atmosphere up to 0.3 MPa three times. Subsequently, the reactor was stirred under 0.3 MPa O<sub>2</sub> at 60 °C until the pressure did not decline any more (replenishing oxygen up to 0.3 MPa promptly if the pressure declined during the reaction period). After cooling to room temperature, the reaction mixture was filtered and washed with 3 mL water. The filter cake was dried and the desired product was obtained (12.11 g). The filtrate was extracted with ethyl acetate (80 mL×3). The combined organic extract phase was dried over Na<sub>2</sub>SO<sub>4</sub>, and after filtration, the solvent was removed on rotovap under reduced pressure. The resulting residue was purified by flash chromatography on silica gel to get the isolated product (0.87 g) with ethyl acetate/hexane (1/10) as eluent. The yield of desired product was calculated by combination of the obtained two parts, giving 91% as the ultimate yield.

#### 5). The circulation of the mother liquor

Condition 6: To a reactor (70 mL) was added 2-mercaptobenzothiazole (1.00g, 6 mmol), Co catalyst (0.8wt%) and the solvent water (10 mL), *tert*-Butylamine (2.19g, 30 mmol) was finally added to the reaction mixture under stirring at room temperature. The reactor was charged with O<sub>2</sub> up to 0.3 MPa three times. Subsequently, the reactor was stirred under 0.3 MPa O<sub>2</sub> at 60 °C for 4 h, replenishing oxygen up to 0.3 MPa promptly if the pressure declined during the reaction period. After cooling to room temperature, the reaction mixture was filtered and washed with 0.5 mL water. The filter cake was dried and the desired product **3a** was obtained, giving the yield up to 92%. The filtrate was reused directly as the solvent in the next run added 2-mercaptobenzothiazole (1.00g, 6.00mmol) and *tert*-butylamine (0.53g, 1.2 equiv.). The results are presented in **Figure 1**. We carried out the oxidation process successfully in 20 runs, with the yields varying as follow: 92%, 91%, 90%, 90%, 90%, 90%, 90%, 90%, 90%, 90%, 90%, 89%, 89%, 89%, 89%, 88%, 88%, 87%, 87%, 86%.

**(C)<sup>1</sup>H and <sup>13</sup>C spectra data of all isolated products.**

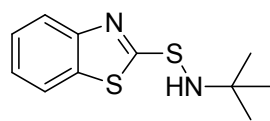

**3a:** White solid, isolated yield 95%, mp: 105-106 °C; <sup>1</sup>H NMR (600 MHz, CDCl<sub>3</sub>, Me<sub>4</sub>Si) δ: 7.80 (d, *J*=8.2 Hz, 1H), 7.77 (d, *J*=8.0 Hz, 1H), 7.39-7.36 (m, 1H), 7.26-7.23 (m, 1H), 3.43 (s, 1H), 1.27 (s, 9H); <sup>13</sup>C NMR (150 MHz, CDCl<sub>3</sub>, Me<sub>4</sub>Si) δ: 181.11, 155.07, 134.87, 125.70, 123.37, 121.40, 120.86, 55.45, 28.96. HRMS (ESI) *m/z* calcd. for C<sub>11</sub>H<sub>14</sub>N<sub>2</sub>S<sub>2</sub>[M+H]<sup>+</sup>: 239.0671, found 239.0675. LRMS (EI) *m/z* calcd. for C<sub>11</sub>H<sub>14</sub>N<sub>2</sub>S<sub>2</sub>M<sup>+</sup>: 238, found 238.

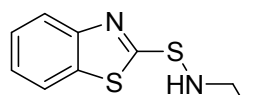

**3b:** Light yellow solid, isolated yield 81%, mp: 32-33 °C; <sup>1</sup>H NMR (600 MHz, CDCl<sub>3</sub>, Me<sub>4</sub>Si) δ: 7.82 (d, *J*=8.1 Hz, 1H), 7.76 (d, *J*=7.9 Hz, 1H), 7.38-7.35 (m, 1H), 7.25-7.21 (m, 1H), 3.41 (t, *J*=5.7 Hz, 1H), 3.07-3.03 (m, 2H), 1.63-1.57 (m, 2H), 0.94 (t, *J*=7.4 Hz, 3H); <sup>13</sup>C NMR (150 MHz, CDCl<sub>3</sub>, Me<sub>4</sub>Si) δ: 178.81, 154.75, 134.79, 125.62, 123.36, 121.28, 120.85, 54.58, 23.56, 11.07. HRMS (ESI) *m/z* calcd. for C<sub>10</sub>H<sub>12</sub>N<sub>2</sub>S<sub>2</sub> [M+H]<sup>+</sup>: 225.0515, found 225.0515. LRMS (EI) *m/z* calcd. for C<sub>10</sub>H<sub>12</sub>N<sub>2</sub>S<sub>2</sub>M<sup>+</sup>: 224, found 224.

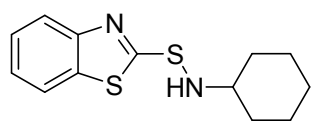

**3c:** White solid, isolated yield 90%, mp: 94-96 °C; <sup>1</sup>H NMR (600 MHz, CDCl<sub>3</sub>, Me<sub>4</sub>Si) δ: 7.80 (d, *J* = 8.1 Hz, 1H), 7.77 (d, *J* = 7.9 Hz, 1H), 7.39-7.36 (m, 1H), 7.26-7.23 (m, 1H), 3.26 (d, *J* = 4.3 Hz, 1H), 2.91-2.87 (m, 1H), 2.08-2.06 (m, 2H), 1.77-1.74 (m, 2H), 1.62-1.59 (m, 1H), 1.28-1.15 (m, 5H); <sup>13</sup>C NMR (150 MHz, CDCl<sub>3</sub>, Me<sub>4</sub>Si) δ: 179.86, 155.04, 134.93, 125.74, 123.45, 121.45, 120.91, 60.21, 33.66, 25.57, 24.81. HRMS (ESI) *m/z* calcd. for C<sub>13</sub>H<sub>16</sub>N<sub>2</sub>S<sub>2</sub> [M+H]<sup>+</sup>: 265.0828, found 265.0830. LRMS (EI) *m/z* calcd. for C<sub>13</sub>H<sub>16</sub>N<sub>2</sub>S<sub>2</sub>M<sup>+</sup>: 264, found 264.

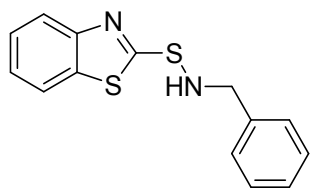

**3d**: White solid, isolated yield 92%, mp: 116-117 °C;  $^1\text{H}$  NMR (600 MHz,  $\text{CDCl}_3$ ,  $\text{Me}_4\text{Si}$ )  $\delta$ : 7.87 (d,  $J$  = 8.2 Hz, 1H), 7.82 (d,  $J$  = 8.0 Hz, 1H), 7.44-7.38 (m, 5H), 7.35-7.28 (m, 2H), 4.27 (d,  $J$  = 6.0 Hz, 2H), 3.66 (t,  $J$  = 6.0 Hz, 1H);  $^{13}\text{C}$  NMR (150 MHz,  $\text{CDCl}_3$ ,  $\text{Me}_4\text{Si}$ )  $\delta$ : 177.42, 154.69, 138.35, 134.88, 128.55, 128.27, 127.80, 125.79, 123.60, 121.48, 120.99, 56.84. HRMS (ESI)  $m/z$  calcd. for  $\text{C}_{14}\text{H}_{12}\text{N}_2\text{S}_2$   $[\text{M}+\text{H}]^+$ : 273.0515, found 273.0518. LRMS (EI)  $m/z$  calcd. for  $\text{C}_{14}\text{H}_{12}\text{N}_2\text{S}_2\text{M}^+$ : 272, found 272.

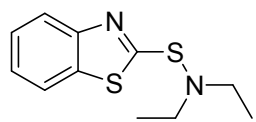

**3e**: Light yellow oil, isolated yield 76%;  $^1\text{H}$  NMR (600 MHz,  $\text{CDCl}_3$ ,  $\text{Me}_4\text{Si}$ )  $\delta$ : 7.80 (d,  $J$  = 8.1 Hz, 1H), 7.77 (d,  $J$  = 7.9 Hz, 1H), 7.39-7.36 (m, 1H), 7.26-7.23 (m, 1H), 3.16 (q,  $J$  = 7.1 Hz, 4H), 1.25 (t,  $J$  = 7.1 Hz, 6H);  $^{13}\text{C}$  NMR (150 MHz,  $\text{CDCl}_3$ ,  $\text{Me}_4\text{Si}$ )  $\delta$ : 179.13, 155.14, 134.95, 125.71, 123.41, 121.43, 120.85, 52.43, 13.43. HRMS (ESI)  $m/z$  calcd. for  $\text{C}_{11}\text{H}_{14}\text{N}_2\text{S}_2$   $[\text{M}+\text{H}]^+$ : 239.0671, found 239.0673. LRMS (EI)  $m/z$  calcd. for  $\text{C}_{11}\text{H}_{14}\text{N}_2\text{S}_2\text{M}^+$ : 238, found 238.

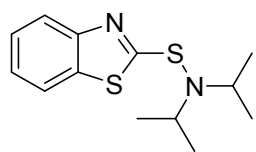

**3f**: White solid, isolated yield 71%, mp: 56-58 °C;  $^1\text{H}$  NMR (600 MHz,  $\text{CDCl}_3$ ,  $\text{Me}_4\text{Si}$ )  $\delta$ : 7.71 (d,  $J$  = 8.0 Hz, 1H), 7.67 (d,  $J$  = 7.7 Hz, 1H), 7.30-7.28 (m, 1H), 7.17-7.14 (m, 1H), 3.42-3.37 (m, 2H), 1.18-1.17 (m, 12H);  $^{13}\text{C}$  NMR (150 MHz,  $\text{CDCl}_3$ ,  $\text{Me}_4\text{Si}$ )  $\delta$ : 182.19, 155.05, 134.70, 125.69, 123.33, 121.31, 120.79, 55.65, 22.44, 21.62. HRMS (ESI)  $m/z$  calcd. for  $\text{C}_{13}\text{H}_{18}\text{N}_2\text{S}_2$   $[\text{M}+\text{H}]^+$ : 267.0984, found 267.0986. LRMS (EI)  $m/z$  calcd. for  $\text{C}_{13}\text{H}_{18}\text{N}_2\text{S}_2\text{M}^+$ : 266, found 266.

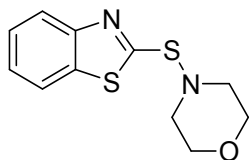

**3g**: White solid, isolated yield 78%, mp: 80-82 °C;  $^1\text{H}$  NMR (600 MHz,  $\text{CDCl}_3$ ,  $\text{Me}_4\text{Si}$ )  $\delta$ : 7.85 (d,  $J=8.1$  Hz, 1H), 7.81 (d,  $J=7.9$  Hz, 1H), 7.42-7.39 (m, 1H), 7.30-7.27 (m, 1H), 3.82 (t,  $J=4.7$  Hz, 4H), 3.28 (m,  $J=4.7$  Hz, 4H);  $^{13}\text{C}$  NMR (150 MHz,  $\text{CDCl}_3$ ,  $\text{Me}_4\text{Si}$ )  $\delta$ : 174.73, 154.98, 134.96, 125.93, 123.88, 121.82, 120.98, 67.82, 56.52. HRMS (ESI)  $m/z$  calcd for  $\text{C}_{11}\text{H}_{12}\text{N}_2\text{OS}_2$   $[\text{M}+\text{H}]^+$ : 253.0464, found 253.0467. LRMS (EI)  $m/z$  calcd. for  $\text{C}_{11}\text{H}_{12}\text{N}_2\text{OS}_2\text{M}^+$ : 252, found 252.

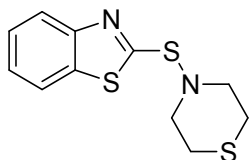

**3h**: White solid, isolated yield 96%, mp: 61-62 °C;  $^1\text{H}$  NMR (600 MHz,  $\text{CDCl}_3$ ,  $\text{Me}_4\text{Si}$ )  $\delta$ : 7.84 (d,  $J=8.2$  Hz, 1H), 7.80 (d,  $J=7.9$  Hz, 1H), 7.42-7.38 (m, 1H), 7.29-7.26 (m, 1H), 3.55 (br, 4H), 2.80-2.77 (m, 4H);  $^{13}\text{C}$  NMR (150 MHz,  $\text{CDCl}_3$ ,  $\text{Me}_4\text{Si}$ )  $\delta$ : 175.61, 155.11, 134.95, 125.91, 123.82, 121.80, 120.97, 58.57, 28.50. HRMS (ESI)  $m/z$  calcd. for  $\text{C}_{11}\text{H}_{12}\text{N}_2\text{S}_3$   $[\text{M}+\text{H}]^+$ : 269.0235, found 269.0237. LRMS (EI)  $m/z$  calcd. for  $\text{C}_{11}\text{H}_{12}\text{N}_2\text{S}_3\text{M}^+$ : 268, found 268.

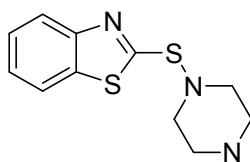

**3i**: White solid, isolated yield 91%, mp: 103-104 °C;  $^1\text{H}$  NMR (600 MHz,  $\text{CDCl}_3$ ,  $\text{Me}_4\text{Si}$ )  $\delta$ : 7.84 (d,  $J=8.2$  Hz, 1H), 7.79 (d,  $J=7.9$  Hz, 1H), 7.41-7.38 (m, 1H), 7.29-7.26 (m, 1H), 3.57-3.56 (m, 4H), 3.23 (br, 4H), 1.47 (s, 9H);  $^{13}\text{C}$  NMR (150 MHz,  $\text{CDCl}_3$ ,  $\text{Me}_4\text{Si}$ )  $\delta$ : 174.62, 154.96, 154.51, 134.99, 125.94, 123.90, 121.84, 120.98, 80.13, 56.16 (2C), 28.35. HRMS (ESI)  $m/z$  calcd. for  $\text{C}_{16}\text{H}_{21}\text{N}_3\text{O}_2\text{S}_2$   $[\text{M}+\text{H}]^+$ : 352.1148, found 352.1150.



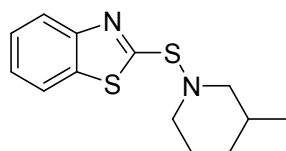

**3j**: Light yellow oil, isolated yield 79%;  $^1\text{H}$  NMR (600 MHz,  $\text{CDCl}_3$ ,  $\text{Me}_4\text{Si}$ )  $\delta$ : 7.82 (d,  $J = 7.9$  Hz, 1H), 7.78 (d,  $J = 7.9$  Hz, 1H), 7.40-7.36 (m, 1H), 7.27-7.24 (m, 1H), 3.29-3.25 (m, 2H), 3.08-3.05 (m, 1H), 2.76 (t,  $J = 10.9$  Hz, 1H), 1.89-1.85 (m, 1H), 1.76-1.73 (m, 3H), 1.00-0.96 (m, 1H), 0.90 (d,  $J = 6.7$  Hz, 3H);  $^{13}\text{C}$  NMR (150 MHz,  $\text{CDCl}_3$ ,  $\text{Me}_4\text{Si}$ )  $\delta$ : 177.46, 155.23, 135.15, 125.71, 123.49, 121.60, 120.91, 64.85, 57.41, 32.62, 31.60, 26.63, 19.16. HRMS (ESI)  $m/z$  calcd. for  $\text{C}_{13}\text{H}_{16}\text{N}_2\text{S}_2$   $[\text{M}+\text{H}]^+$ : 265.0828, found 265.0831. LRMS (EI)  $m/z$  calcd. for  $\text{C}_{13}\text{H}_{16}\text{N}_2\text{S}_2\text{M}^+$ : 264, found 264.

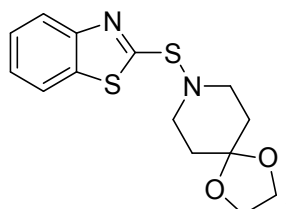

**3k**: White solid, isolated yield 81%, mp: 110-111 °C;  $^1\text{H}$  NMR (600 MHz,  $\text{CDCl}_3$ ,  $\text{Me}_4\text{Si}$ )  $\delta$ : 7.82 (d,  $J = 8.1$  Hz, 1H), 7.79 (d,  $J = 7.9$  Hz, 1H), 7.40-7.37 (m, 1H), 7.28-7.25 (m, 1H), 3.97 (br, 4H), 3.38 (t,  $J = 5.5$  Hz, 4H), 1.89 (t,  $J = 5.6$  Hz, 4H);  $^{13}\text{C}$  NMR (150 MHz,  $\text{CDCl}_3$ ,  $\text{Me}_4\text{Si}$ )  $\delta$ : 176.76, 155.22, 135.13, 125.79, 123.61, 121.68, 120.96, 105.75, 64.34, 55.14, 36.06. HRMS (ESI)  $m/z$  calcd. for  $\text{C}_{14}\text{H}_{16}\text{N}_2\text{O}_2\text{S}_2$   $[\text{M}+\text{H}]^+$ : 309.0726, found 309.0732. LRMS (EI)  $m/z$  calcd. for  $\text{C}_{14}\text{H}_{16}\text{N}_2\text{O}_2\text{S}_2\text{M}^+$ : 308, found 308.

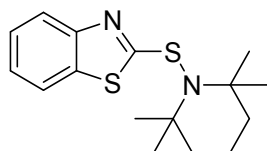

**3l**: White solid, isolated yield 19%, mp: 136-138 °C;  $^1\text{H}$  NMR (600 MHz,  $\text{CDCl}_3$ ,  $\text{Me}_4\text{Si}$ )  $\delta$ : 7.79 (d,  $J = 8.1$  Hz, 1H), 7.75 (d,  $J = 7.9$  Hz, 1H), 7.39-7.36 (m, 1H), 7.26-7.23 (m, 1H), 1.74-1.71 (m, 5H), 1.57-1.54 (m, 1H), 1.41 (s, 6H), 1.27 (s, 6H);  $^{13}\text{C}$  NMR (150 MHz,  $\text{CDCl}_3$ ,  $\text{Me}_4\text{Si}$ )  $\delta$ : 182.14, 154.52, 134.60, 125.69, 123.31, 121.33, 120.71, 61.04, 40.72, 32.48, 24.85, 17.26. HRMS (ESI)  $m/z$  calcd. for

$C_{16}H_{22}N_2S_2$   $[M+H]^+$ : 307.1297, found 307.1307. LRMS (EI)  $m/z$  calcd. for  $C_{16}H_{22}N_2S_2M^+$ : 306, found 306.

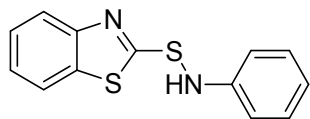

**3m**: Light yellow solid, isolated yield 59%, mp: 119-121 °C;  $^1H$  NMR (600 MHz,  $CDCl_3$ ,  $Me_4Si$ )  $\delta$ : 7.88 (d,  $J$  = 8.2 Hz, 1H), 7.72 (d,  $J$  = 8.0 Hz, 1H), 7.44-7.41 (m, 1H), 7.30-7.26 (m, 3H), 7.13-7.12 (m, 2H), 6.98 (t,  $J$  = 7.3 Hz, 1H), 5.61 (br, 1H);  $^{13}C$  NMR (100 MHz,  $CDCl_3$ ,  $Me_4Si$ )  $\delta$ : 176.27, 154.72, 144.90, 134.88, 129.43, 126.10, 124.02, 121.85, 121.79, 121.10, 115.18. HRMS (ESI)  $m/z$  calcd. for  $C_{13}H_{10}N_2S_2$   $[M+H]^+$ : 259.0358, found 259.0363. LRMS (EI)  $m/z$  calcd. for  $C_{13}H_{10}N_2S_2M^+$ : 258, found 258.

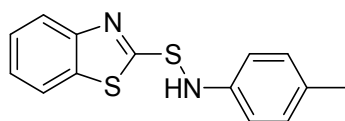

**3n**: Light yellow solid, isolated yield 67%, mp: 142-143 °C;  $^1H$  NMR (600 MHz,  $CDCl_3$ ,  $Me_4Si$ )  $\delta$ : 7.86 (d,  $J$  = 8.2 Hz, 1H), 7.69 (d,  $J$  = 8.0 Hz, 1H), 7.39 (t,  $J$  = 7.6 Hz, 1H), 7.25 (t,  $J$  = 7.5 Hz, 1H), 7.07-7.05 (m, 2H), 7.00-6.99 (m, 2H), 5.51 (br, 1H), 2.27 (s, 3H);  $^{13}C$  NMR (150 MHz,  $CDCl_3$ ,  $Me_4Si$ )  $\delta$ : 176.79, 154.74, 142.51, 134.89, 131.23, 129.90, 126.04, 123.92, 121.73, 121.08, 115.19, 20.49. HRMS (ESI)  $m/z$  calcd. for  $C_{14}H_{12}N_2S_2$   $[M+H]^+$ : 273.0515, found 273.0521. LRMS (EI)  $m/z$  calcd. for  $C_{14}H_{12}N_2S_2M^+$ : 272, found 272.

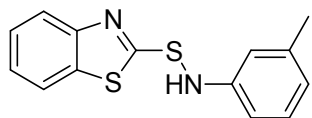

**3o**: Light yellow solid, isolated yield 65%, mp: 84-85 °C;  $^1H$  NMR (600 MHz,  $CDCl_3$ ,  $Me_4Si$ )  $\delta$ : 7.90 (d,  $J$  = 8.2 Hz, 1H), 7.72 (d,  $J$  = 7.9 Hz, 1H), 7.44-7.41 (m, 1H), 7.29-7.26 (m, 1H), 7.17 (t,  $J$  = 7.8 Hz, 1H), 6.95-6.92 (m, 2H), 6.81-6.80 (m, 1H), 5.70 (br, 1H), 2.32 (s, 3H);  $^{13}C$  NMR (150 MHz,  $CDCl_3$ ,  $Me_4Si$ )

$\delta$ : 176.87, 154.69, 144.86, 139.42, 134.83, 129.20, 126.03, 123.90, 122.63, 121.66, 121.06, 115.67, 112.29, 21.45. HRMS (ESI)  $m/z$  calcd. for  $C_{14}H_{12}N_2S_2$   $[M+H]^+$ : 273.0515, found 273.0520. LRMS (EI)  $m/z$  calcd. for  $C_{14}H_{12}N_2S_2M^+$ : 272, found 272.

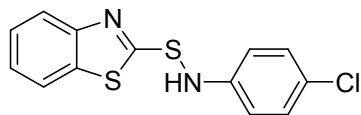

**3p**: Light yellow solid, isolated yield: 47%, mp: 154-

156 °C;  $^1H$  NMR (600 MHz,  $CDCl_3$ ,  $Me_4Si$ )  $\delta$  : 7.87 (d,  $J$  = 8.2 Hz, 1H), 7.74 (d,  $J$  = 8.0 Hz, 1H), 7.43 (t,  $J$  = 7.7 Hz, 1H), 7.29 (t,  $J$  = 7.7 Hz, 1H), 7.23 (d,  $J$  = 8.8 Hz, 2H), 7.05 (d,  $J$  = 8.8 Hz, 2H), 5.56 (s, 1H);  $^{13}C$  NMR (150 MHz,  $CDCl_3$ ,  $Me_4Si$ )  $\delta$ : 175.14, 154.64, 143.63, 134.82, 129.38, 126.79, 126.23, 124.21, 121.91, 121.15, 116.44. HRMS (ESI)  $m/z$  calcd. for  $C_{13}H_9ClN_2S_2$   $[M+H]^+$ : 292.9968, found 292.9965.

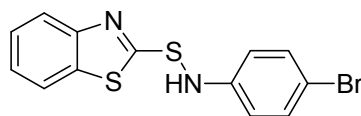

**3q**: Light yellow solid, isolated yield: 53%, mp: 150-152

°C;  $^1H$  NMR (600 MHz,  $CDCl_3$ ,  $Me_4Si$ )  $\delta$  : 7.87 (d,  $J$  = 8.2 Hz, 1H), 7.74 (d,  $J$  = 8.0 Hz, 1H), 7.43 (t,  $J$  = 7.4 Hz, 1H), 7.36 (d,  $J$  = 8.6 Hz, 2H), 7.29 (t,  $J$  = 7.5 Hz, 1H), 7.00 (d,  $J$  = 8.7 Hz, 2H), 5.59 (s, 1H);  $^{13}C$  NMR (150 MHz,  $CDCl_3$ ,  $Me_4Si$ )  $\delta$ : 175.13, 154.59, 144.16, 134.80, 132.25, 126.22, 124.21, 121.87, 121.14, 116.85, 114.01. HRMS (ESI)  $m/z$  calcd. for  $C_{13}H_9BrN_2S_2$   $[M+H]^+$ : 336.9463, found 336.9462.

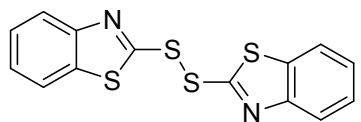

**4a1**: White solid, isolated yield: 99%, mp: 179-180 °C;  $^1H$

NMR (400 MHz,  $CDCl_3$ ,  $Me_4Si$ )  $\delta$ : 7.94 (d,  $J$  = 8.2 Hz, 2H), 7.77 (d,  $J$  = 8.0 Hz, 2H), 7.46 (t,  $J$  = 7.3 Hz, 2H), 7.35 (t,  $J$  = 7.4 Hz, 2H);  $^{13}C$  NMR (100 MHz,  $CDCl_3$ ,  $Me_4Si$ )  $\delta$ : 167.83, 154.52, 136.12, 126.57, 125.29, 122.67, 121.29.

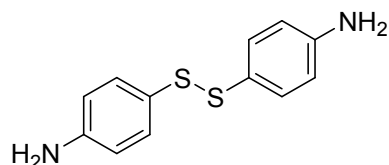

**4b<sup>2</sup>**: Yellow solid, isolated yield: 96%, mp: 75-77 °C;  
<sup>1</sup>H NMR (400 MHz, CDCl<sub>3</sub>, Me<sub>4</sub>Si) δ: 7.24 (d, *J* = 8.4 Hz, 4H), 6.55 (d, *J* = 8.4 Hz, 4H), 3.76 (br, 4H); <sup>13</sup>C NMR (100 MHz, CDCl<sub>3</sub>, Me<sub>4</sub>Si) δ: 147.06, 133.85, 125.48, 115.29. LRMS (EI) *m/z* calcd. for C<sub>12</sub>H<sub>12</sub>N<sub>2</sub>S<sub>2</sub>M<sup>+</sup>: 248, found 248.

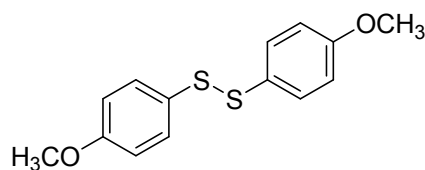

**4c<sup>1</sup>**: Light yellow solid, isolated yield: 99%, mp: 34-35 °C; <sup>1</sup>H NMR (400 MHz, CDCl<sub>3</sub>, Me<sub>4</sub>Si) δ: 7.42 (d, *J* = 8.6 Hz, 4H), 6.85 (d, *J* = 8.6 Hz, 4H), 3.79 (s, 6H); <sup>13</sup>C NMR (100 MHz, CDCl<sub>3</sub>, Me<sub>4</sub>Si) δ: 159.81, 132.54, 128.30, 114.53, 55.25. LRMS (EI) *m/z* calcd. for C<sub>14</sub>H<sub>14</sub>O<sub>2</sub>S<sub>2</sub>M<sup>+</sup>: 278, found 278.

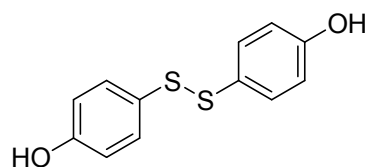

**4d<sup>3</sup>**: White solid, isolated yield: 97%, mp: 148-149 °C;  
<sup>1</sup>H NMR (400 MHz, (CD<sub>3</sub>)<sub>2</sub>SO, Me<sub>4</sub>Si) δ: 9.83 (s, 2H), 7.27 (d, *J* = 8.5 Hz, 4H), 6.76 (d, *J* = 8.4 Hz, 4H); <sup>13</sup>C NMR (100 MHz, (CD<sub>3</sub>)<sub>2</sub>SO, Me<sub>4</sub>Si) δ: 158.26, 133.01, 125.12, 116.30. LRMS (EI) *m/z* calcd. for C<sub>12</sub>H<sub>10</sub>O<sub>2</sub>S<sub>2</sub>M<sup>+</sup>: 250, found 250.

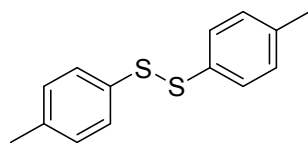

**4e<sup>1</sup>**: White solid, isolated yield: 98%, mp: 47-48 °C; <sup>1</sup>H NMR (600 MHz, CDCl<sub>3</sub>, Me<sub>4</sub>Si) δ: 7.40 (d, *J* = 7.2 Hz, 4H), 7.12 (d, *J* = 7.8 Hz, 4H), 2.33 (s, 6H); <sup>13</sup>C NMR (150 MHz, CDCl<sub>3</sub>, Me<sub>4</sub>Si) δ: 137.41, 133.89, 129.76, 128.52, 21.03. LRMS (EI) *m/z* calcd. for C<sub>14</sub>H<sub>14</sub>S<sub>2</sub> M<sup>+</sup>: 246, found 246.

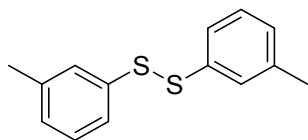

**4f<sup>4</sup>**: Light yellow oil, isolated yield: 95%; <sup>1</sup>H NMR (600 MHz, CDCl<sub>3</sub>, Me<sub>4</sub>Si) δ: 7.29 (s, 4H), 7.16-7.13 (m, 2H), 6.99-6.98 (m, 2H), 2.28 (s, 6H); <sup>13</sup>C NMR (150 MHz, CDCl<sub>3</sub>, Me<sub>4</sub>Si) δ: 138.80, 136.85, 128.82, 127.93 (2C), 124.49, 21.29. LRMS (EI) m/z calcd. for C<sub>14</sub>H<sub>14</sub>S<sub>2</sub>M<sup>+</sup>: 246, found 246.

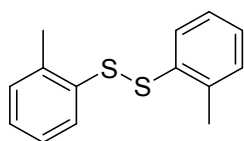

**4g<sup>5</sup>**: White solid, isolated yield: 94%, mp: 38-39 °C; <sup>1</sup>H NMR (600 MHz, CDCl<sub>3</sub>, Me<sub>4</sub>Si) δ: 7.57-7.55 (m, 2H), 7.20-7.17 (m, 6H), 2.47 (s, 6H); <sup>13</sup>C NMR (150 MHz, CDCl<sub>3</sub>, Me<sub>4</sub>Si) δ: 137.30, 135.35, 130.25, 128.58, 127.26, 126.63, 19.95. LRMS (EI) m/z calcd. for C<sub>14</sub>H<sub>14</sub>S<sub>2</sub>M<sup>+</sup>: 246, found 246.

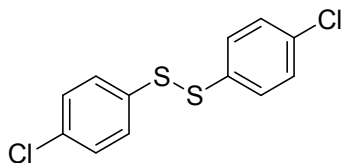

**4h<sup>1</sup>**: White solid, isolated yield: 97%, mp: 63-64 °C; <sup>1</sup>H NMR (400 MHz, CDCl<sub>3</sub>, Me<sub>4</sub>Si) δ: 7.37 (d, *J* = 8.6 Hz, 4H), 7.24 (d, *J* = 8.6 Hz, 4H); <sup>13</sup>C NMR (100 MHz, CDCl<sub>3</sub>, Me<sub>4</sub>Si) δ: 135.07, 133.54, 129.22 (2C). LRMS (EI) m/z calcd. for C<sub>14</sub>H<sub>14</sub>Cl<sub>2</sub>S<sub>2</sub>M<sup>+</sup>: 286, found 286.

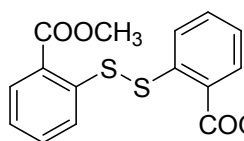

**4i<sup>6</sup>**: White solid, isolated yield: 98%, mp: 126-128 °C; <sup>1</sup>H NMR (600 MHz, CDCl<sub>3</sub>, Me<sub>4</sub>Si) δ: 8.05 (d, *J* = 7.8 Hz, 2H), 7.75 (d, *J* = 8.1 Hz, 2H), 7.42-7.38 (m, 2H), 7.24-7.21 (m, 2H), 3.98 (s, 6H); <sup>13</sup>C NMR (150 MHz, CDCl<sub>3</sub>, Me<sub>4</sub>Si) δ: 166.86, 140.32, 133.03, 131.42, 127.27, 125.80, 125.44, 52.33. LRMS (EI) m/z calcd. For C<sub>16</sub>H<sub>14</sub>O<sub>4</sub>S<sub>2</sub> M<sup>+</sup>: 334, found 334.

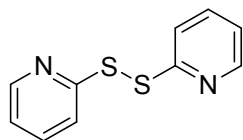

**4j**

**4j**<sup>1</sup>: Yellow solid, isolated yield: 97%, yield: 51-52 °C; <sup>1</sup>H NMR (400 MHz, CDCl<sub>3</sub>, Me<sub>4</sub>Si) δ: 8.40 (d, *J* = 4.6 Hz, 2H), 7.55 (br, 4H), 7.06-7.03 (m, 2H); <sup>13</sup>C NMR (100 MHz, CDCl<sub>3</sub>, Me<sub>4</sub>Si) δ: 158.62, 149.33, 137.21, 120.94, 119.46. LRMS (EI) *m/z* calcd. For C<sub>10</sub>H<sub>8</sub>N<sub>2</sub>S<sub>2</sub> M<sup>+</sup>: 220, found 220.

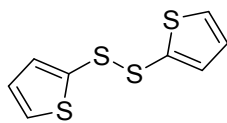

**4k7**: Light yellow solid, isolated yield: 91%, yield: 56-57°C; <sup>1</sup>H

NMR (400 MHz, CDCl<sub>3</sub>, Me<sub>4</sub>Si) δ: 7.50 (d, *J* = 5.2 Hz, 2H), 7.17 (d, *J* = 3.6 Hz, 2H), 7.03-7.01 (m, 2H); <sup>13</sup>C NMR (100 MHz, CDCl<sub>3</sub>, Me<sub>4</sub>Si) δ: 135.63, 135.58, 132.22, 127.70. LRMS (EI) *m/z* calcd. For C<sub>8</sub>H<sub>6</sub>S<sub>4</sub> M<sup>+</sup>: 230, found 230.

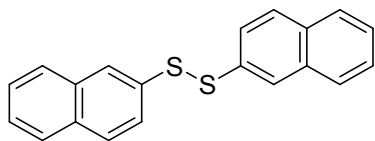

**4l8**: White solid: isolated yield: 94%, mp: 139-141 °C; <sup>1</sup>H

NMR (400 MHz, CDCl<sub>3</sub>, Me<sub>4</sub>Si) δ: 8.00 (s, 2H), 7.81-7.63 (m, 8H), 7.49-7.44 (m, 4H); <sup>13</sup>C NMR (100 MHz, CDCl<sub>3</sub>, Me<sub>4</sub>Si) δ: 134.24, 133.44, 132.47, 128.95, 127.74, 127.44, 126.71, 126.53, 126.21, 125.64.

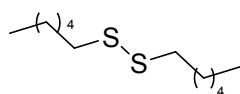

**4m9**: Colorless oil, isolated yield: 94%; <sup>1</sup>H NMR (400 MHz, CDCl<sub>3</sub>,

Me<sub>4</sub>Si) δ: 2.68 (t, *J* = 7.3 Hz, 4H), 1.70-1.63 (m, 4H), 1.40-1.29 (m, 12H), 0.89 (t, *J* = 6.4 Hz, 6H); <sup>13</sup>C NMR (100 MHz, CDCl<sub>3</sub>, Me<sub>4</sub>Si) δ: 39.19, 31.42, 29.17, 28.19, 22.53, 14.02. LRMS (EI) *m/z* calcd. for C<sub>12</sub>H<sub>26</sub>S<sub>2</sub> M<sup>+</sup>: 234, found 234.

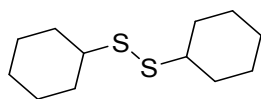

**4n**<sup>10</sup>: Colorless oil, isolated yield: 93%; <sup>1</sup>H NMR (400 MHz, CDCl<sub>3</sub>, Me<sub>4</sub>Si) δ: 2.68-2.67 (m, 2H), 2.05-2.02 (m, 4H), 1.79 (br, 4H), 1.63-1.60 (m, 2H), 1.31-1.24 (m, 10H); <sup>13</sup>C NMR (100 MHz, CDCl<sub>3</sub>, Me<sub>4</sub>Si) δ: 49.94, 32.83, 26.07, 25.67. LRMS (EI) m/z calcd. for C<sub>12</sub>H<sub>22</sub>S<sub>2</sub> M<sup>+</sup>: 230, found 230.

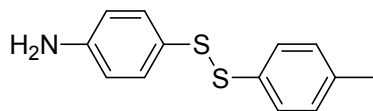

**5a**: Yellow solid, isolated yield: 91%, mp: 42-43 °C; <sup>1</sup>H NMR (400 MHz, CDCl<sub>3</sub>, Me<sub>4</sub>Si) δ: 7.40 (d, *J* = 8.0 Hz, 2H), 7.29 (d, *J* = 8.4 Hz, 2H), 7.12 (d, *J* = 7.8 Hz, 2H), 6.58 (d, *J* = 8.4 Hz, 2H), 3.76 (br, 2H), 2.34 (s, 3H); <sup>13</sup>C NMR (100 MHz, CDCl<sub>3</sub>, Me<sub>4</sub>Si) δ: 147.01, 137.46, 134.33, 133.03, 129.66, 129.40, 125.16, 115.38, 21.05. HRMS (ESI) m/z calcd. for C<sub>13</sub>H<sub>13</sub>NS<sub>2</sub> [M+H]<sup>+</sup>: 248.0562, found 248.0564. LRMS (EI) m/z calcd. for C<sub>13</sub>H<sub>13</sub>NS<sub>2</sub> M<sup>+</sup>: 247, found 247.

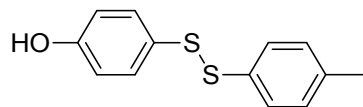

**5b**<sup>11</sup>: White solid, isolated yield: 94%, mp: 67-68 °C; <sup>1</sup>H NMR (600 MHz, (CD<sub>3</sub>)<sub>2</sub>SO, Me<sub>4</sub>Si) δ: 9.85 (s, 1H), 7.39-7.31 (m, 4H), 7.19 (d, *J* = 7.9 Hz, 2H), 6.76 (d, *J* = 8.6 Hz, 2H), 2.29 (s, 3H); <sup>13</sup>C NMR (150 MHz, (CD<sub>3</sub>)<sub>2</sub>SO, Me<sub>4</sub>Si) δ: 158.29, 137.36, 133.07, 132.56, 129.95, 128.50, 124.65, 116.35, 20.58. LRMS (EI) m/z calcd. for C<sub>13</sub>H<sub>12</sub>OS<sub>2</sub> M<sup>+</sup>: 248, found 248.

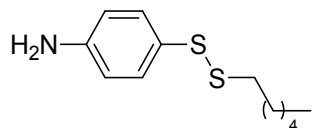

**5c**: Yellow oil, isolated yield: 96%; <sup>1</sup>H NMR (400 MHz, CDCl<sub>3</sub>, Me<sub>4</sub>Si) δ: 7.35 (d, *J* = 8.4 Hz, 2H), 6.62 (d, *J* = 8.4 Hz, 2H), 3.77 (br, 2H), 2.73 (t, *J* = 7.2 Hz, 2H), 1.71-1.63 (m, 2H), 1.37-1.27 (m, 6H), 0.88 (t, *J* = 6.56 Hz, 3H); <sup>13</sup>C NMR (100 MHz, CDCl<sub>3</sub>, Me<sub>4</sub>Si) δ: 146.64, 132.76, 125.36, 115.40, 38.67, 31.31, 28.59, 28.11, 22.45, 13.97. HRMS (ESI) m/z calcd. for C<sub>12</sub>H<sub>19</sub>NS<sub>2</sub> [M+H]<sup>+</sup>: 242.1032, found 242.1038. LRMS (EI) m/z calcd. for C<sub>12</sub>H<sub>19</sub>NS<sub>2</sub> M<sup>+</sup>: 241, found 241.

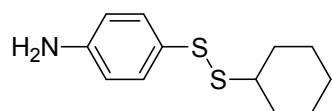

**5d**: Yellow oil, isolated yield: 97%;  $^1\text{H}$  NMR (400 MHz,  $\text{CDCl}_3$ ,  $\text{Me}_4\text{Si}$ )  $\delta$ : 7.35 (d,  $J = 8.4$  Hz, 2H), 6.61 (d,  $J = 8.3$  Hz, 2H), 3.74 (br, 2H), 2.83-2.77 (m, 1H), 2.04-2.01 (m, 2H), 1.76-1.74 (m, 2H), 1.61-1.58 (m, 1H), 1.39-1.19 (m, 5H);  $^{13}\text{C}$  NMR (100 MHz,  $\text{CDCl}_3$ ,  $\text{Me}_4\text{Si}$ )  $\delta$ : 146.23, 131.85, 126.21, 115.40, 49.39, 32.48, 25.91, 25.60. HRMS (ESI)  $m/z$  calcd. for  $\text{C}_{12}\text{H}_{17}\text{NS}_2$   $[\text{M}+\text{H}]^+$ : 240.0875, found 240.0879. LRMS (EI)  $m/z$  calcd. for  $\text{C}_{12}\text{H}_{17}\text{NS}_2$   $\text{M}^+$ : 239, found 239.



#### (D)References.

1. Oba, M.; Tanaka, K.; Nishiyama, K.; Ando, W. *J. Org. Chem.*, **2011**, 76, 4173.
2. Khan, K. M.;Taha, M.; Rahim, F.; Ali, M.; Jamil, W.;Perveen, S.;Choudhary, M. *Lett. Org. Chem.*,**2010**, 7, 415-419.
3. Tan, K. Y. D.; Teng, G. F.; Fan, W. Y. *Organometallics*, **2011**, 30, 4136-4143.
- 4.Figuly, G. D.; Martin, J. C.*J. Org. Chem.*,**1980**,45, 3728-3729.
5. Zhao, J. W.; Song, T.; Jiang, H. L.; Xu, L. Z.; Zhu, S. Z.*Chin. J. Chem.*,**2010**, 28, 1623-1629.
6. MacDonald, J. A.;Marchand, M. E.; Langler, R.F.*BloodCoagul. Fibrin.*,**2004**,15, 447-450.
7. Vvedenskii, V. Y.; Shtefan, E. D.; Ul'ev, M. V.; Zhnikin, A. R.; Shkarupa, T. A.; Deryagina, E. N.; Voronkov, M. G. *Zh. Org. Khim.*,**1992**, 28, 212-213.
8. Ruano, J. L. G.;Parra,A.;Alemán,J. *Green Chem.*,**2008**, 10, 706-711.
- 9.Bittell, J. E.; Speier, J. L. *J. Org. Chem.*, **1978**, 43, 1687-1689.
10. Talla, A.; Driessen, B.; Straathof, N. J. W.; Milroy, L.-G.; Brunsveld, L.; Hessel, V.; Noël, T. *Adv. Synth. Catal.*,**2015**, 357, 2180-2186.
- 11.Demkowicz, S.; Rachon, J.; Witt, D. *Synthesis*, **2008**, 13, 2033-2038.

**(E) Copies of all spectra.**

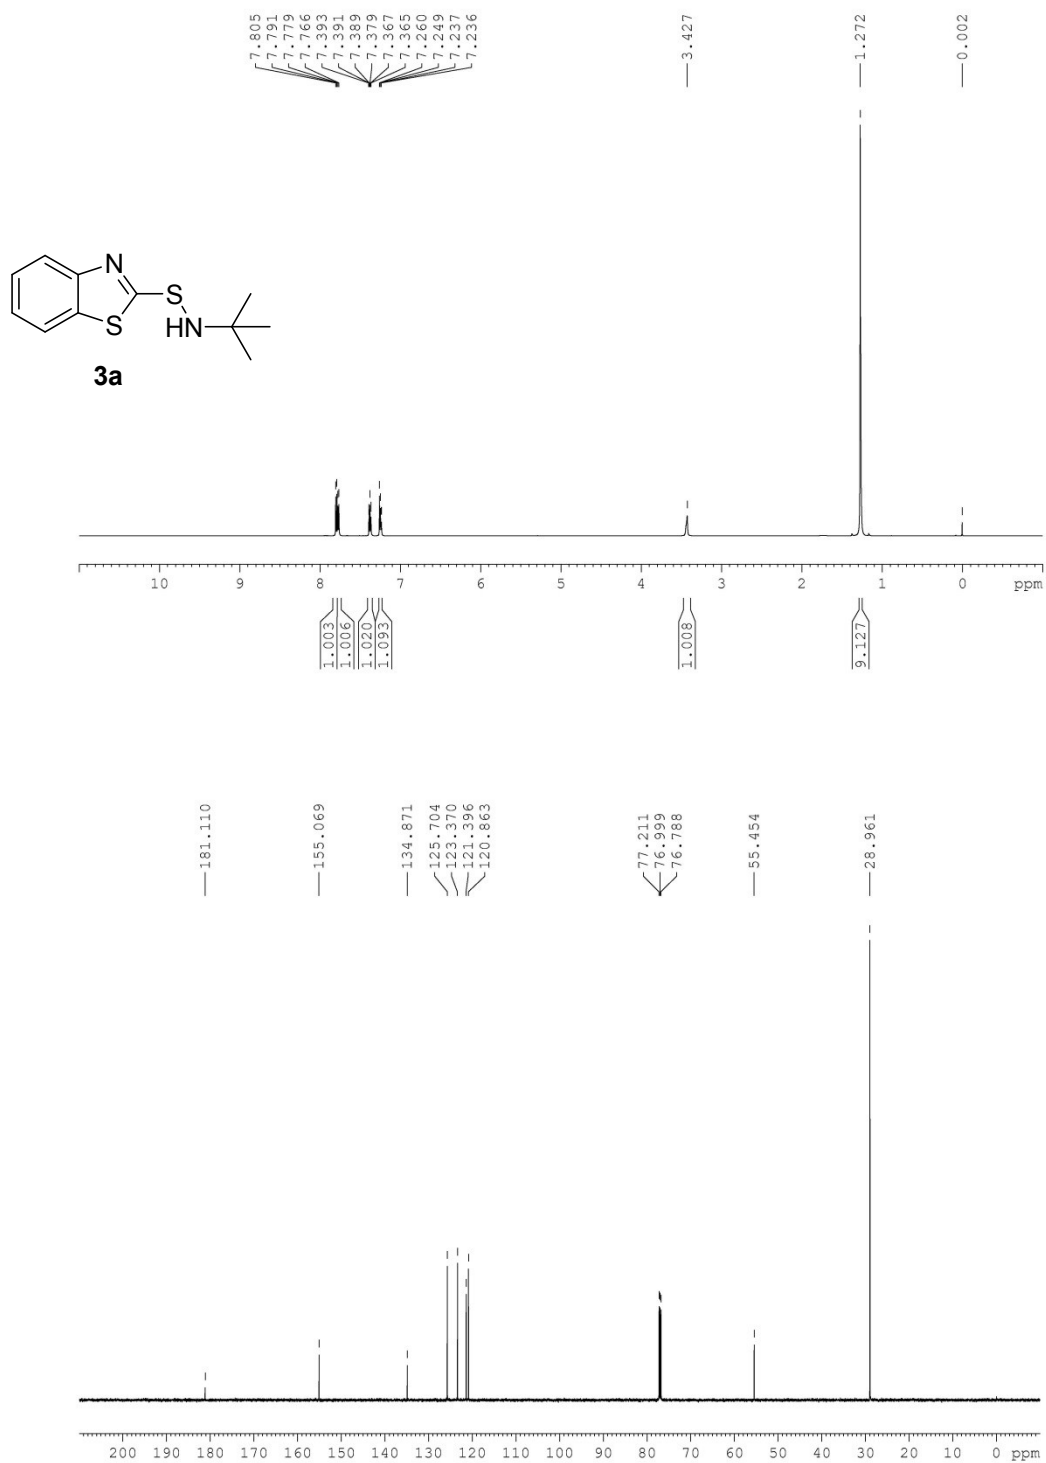

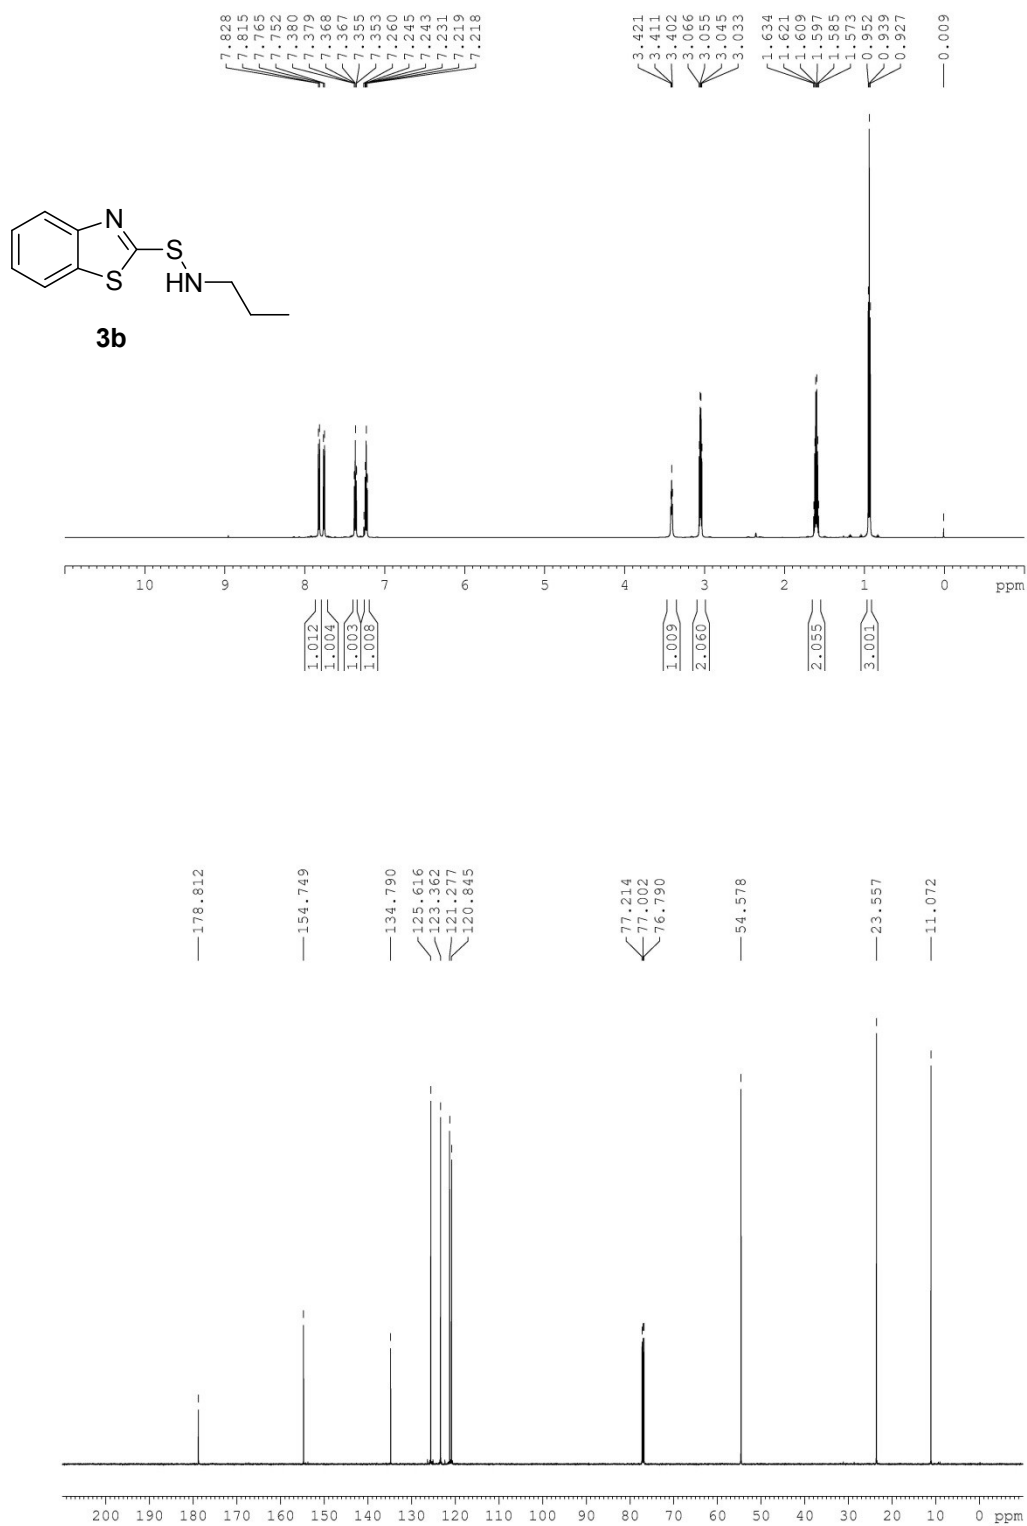

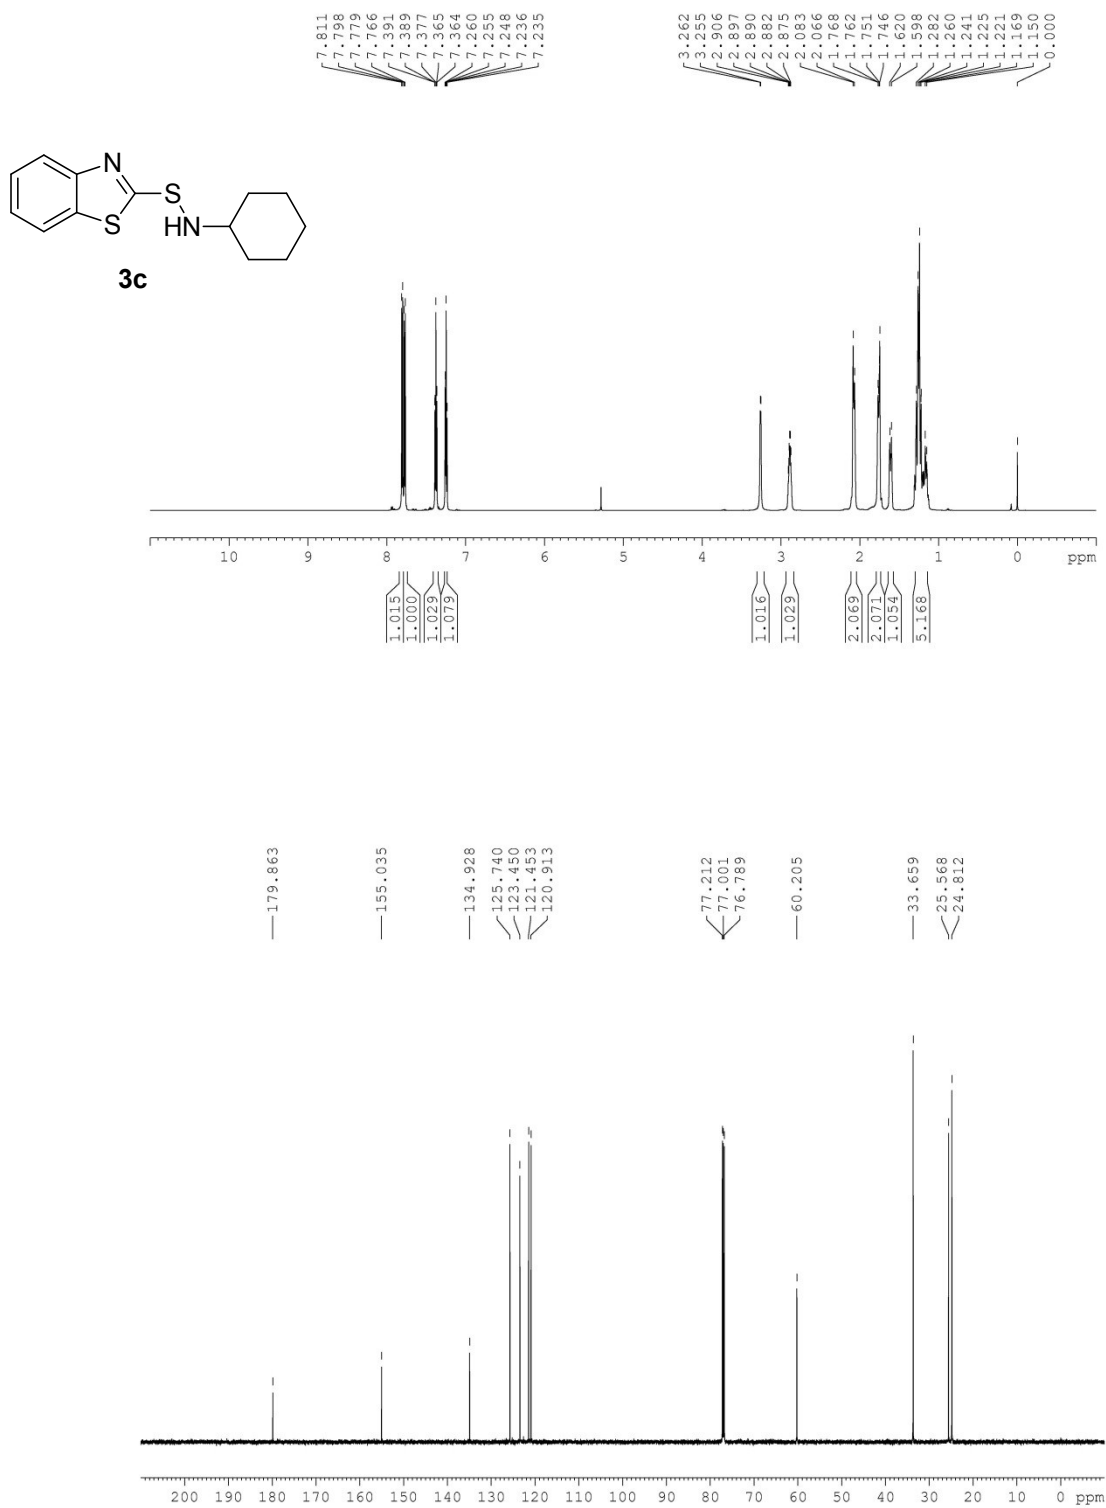

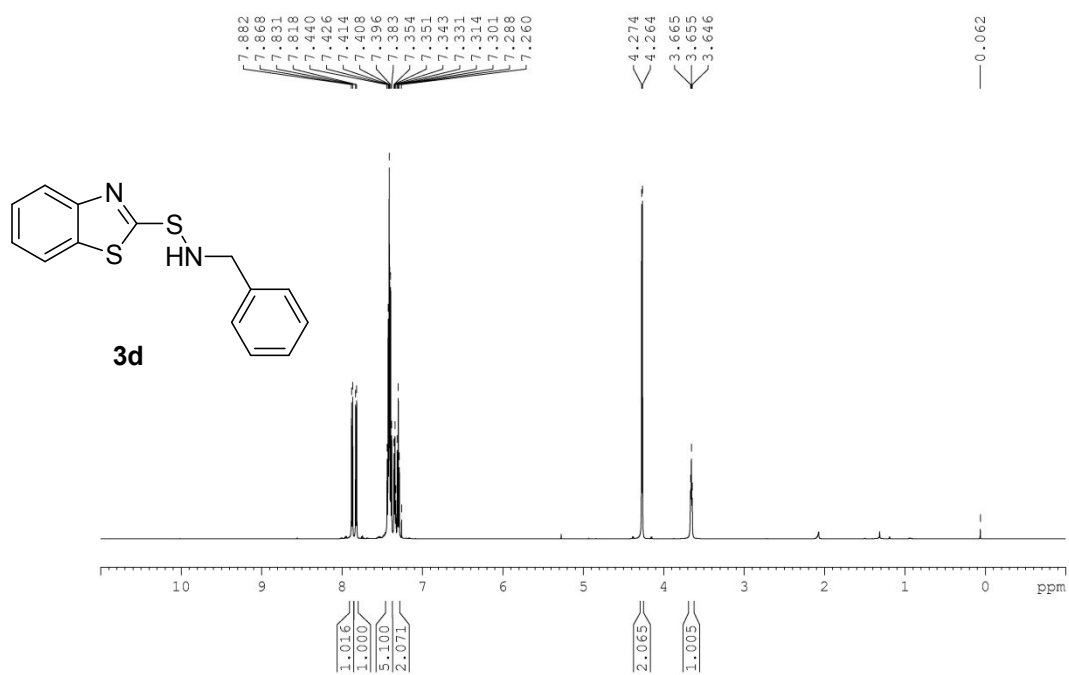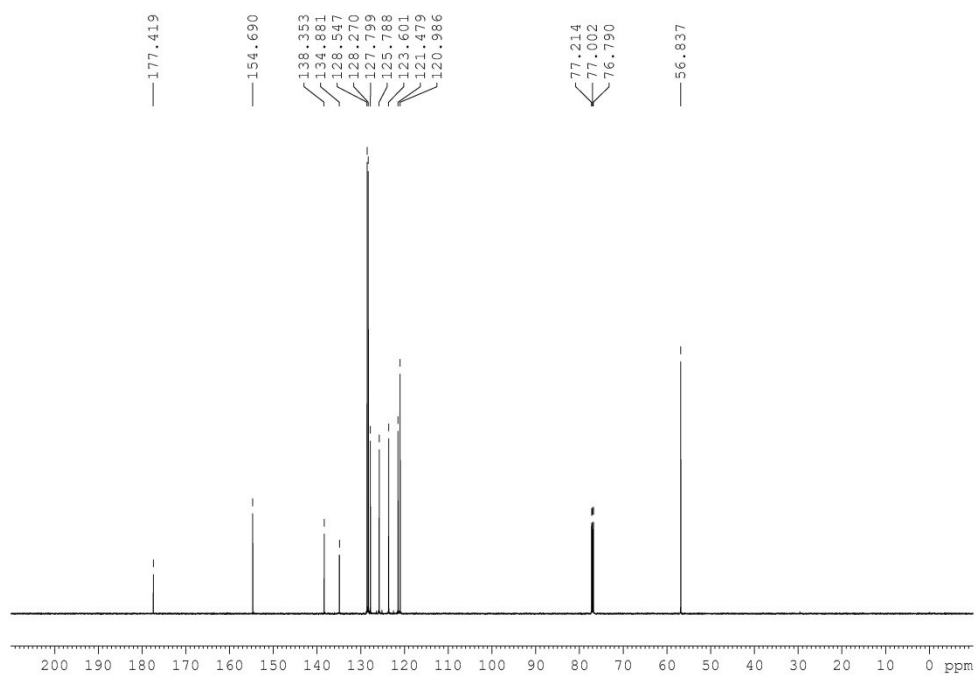

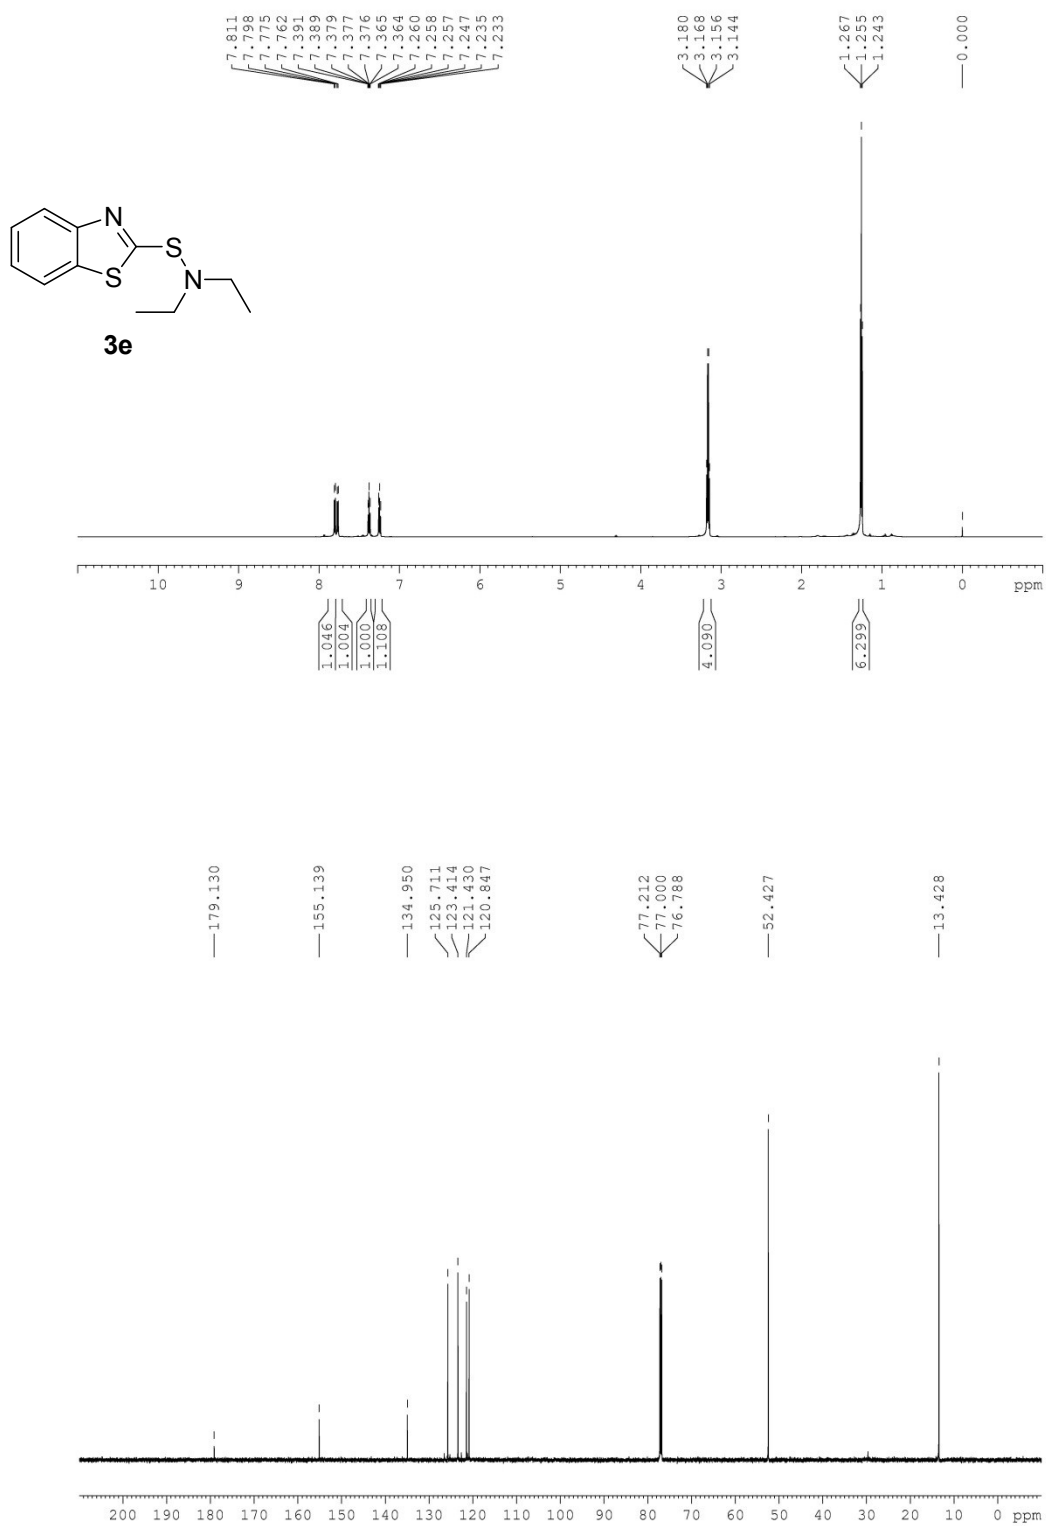

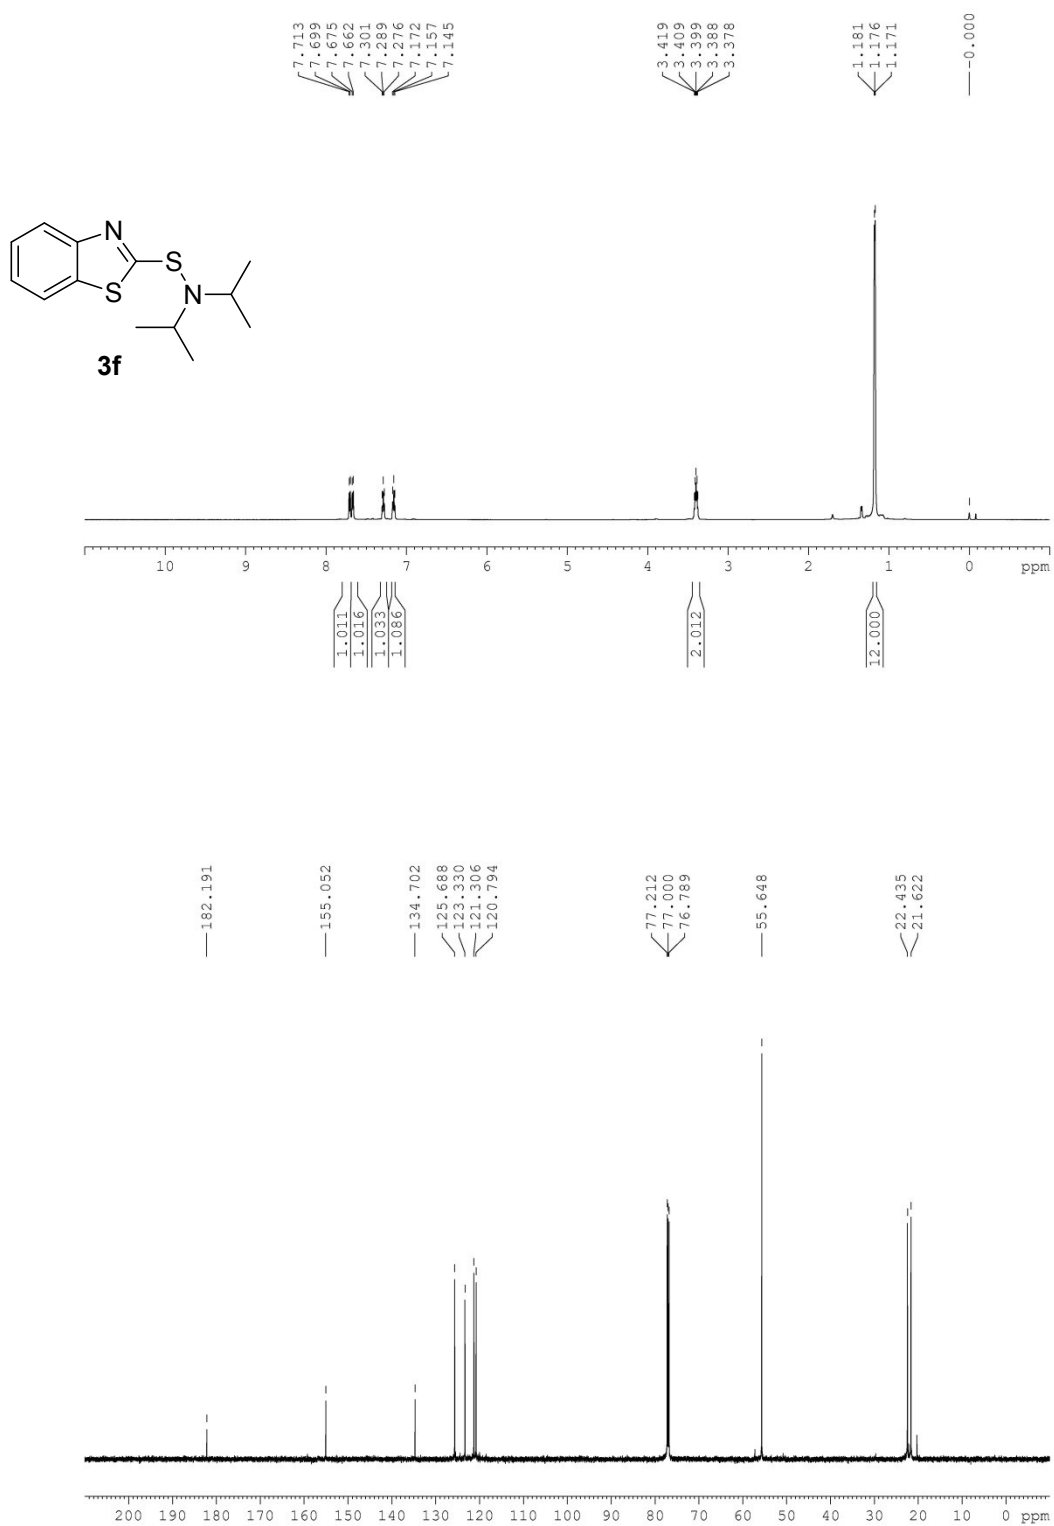

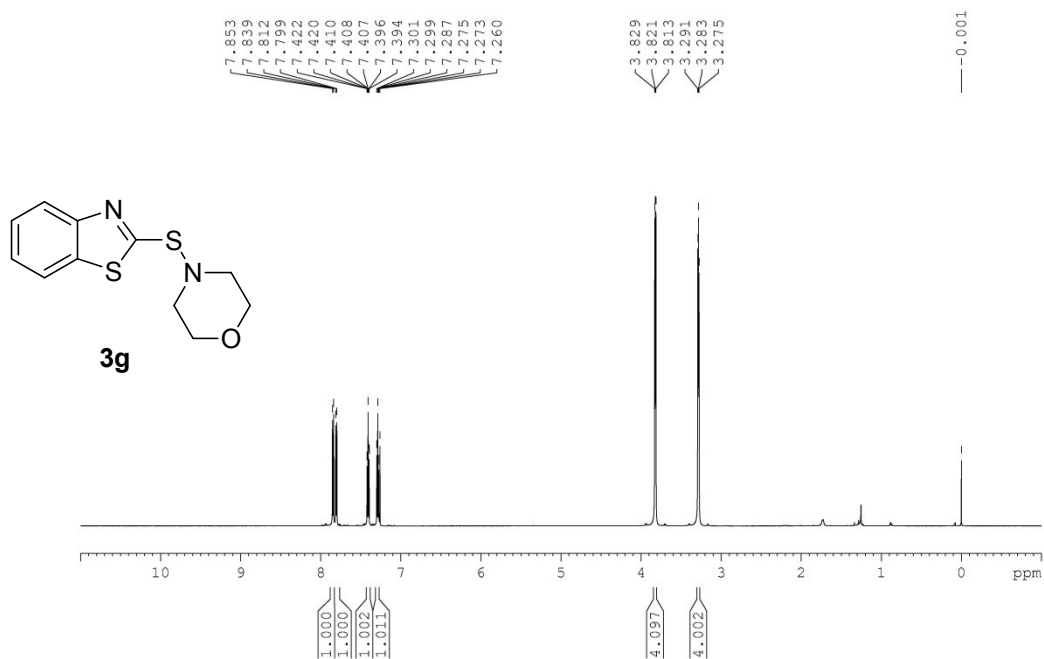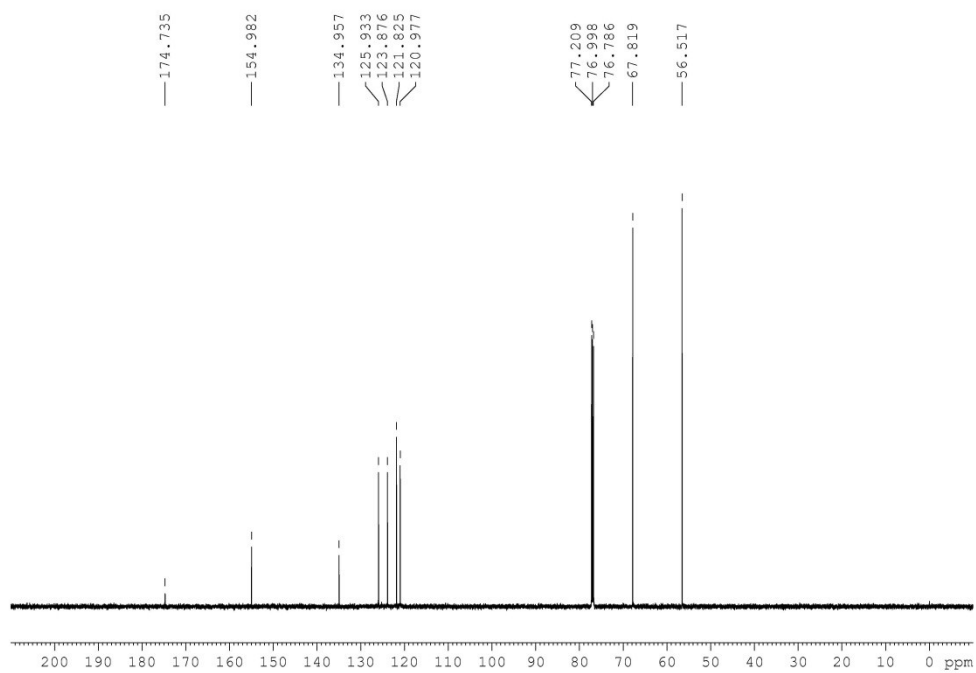



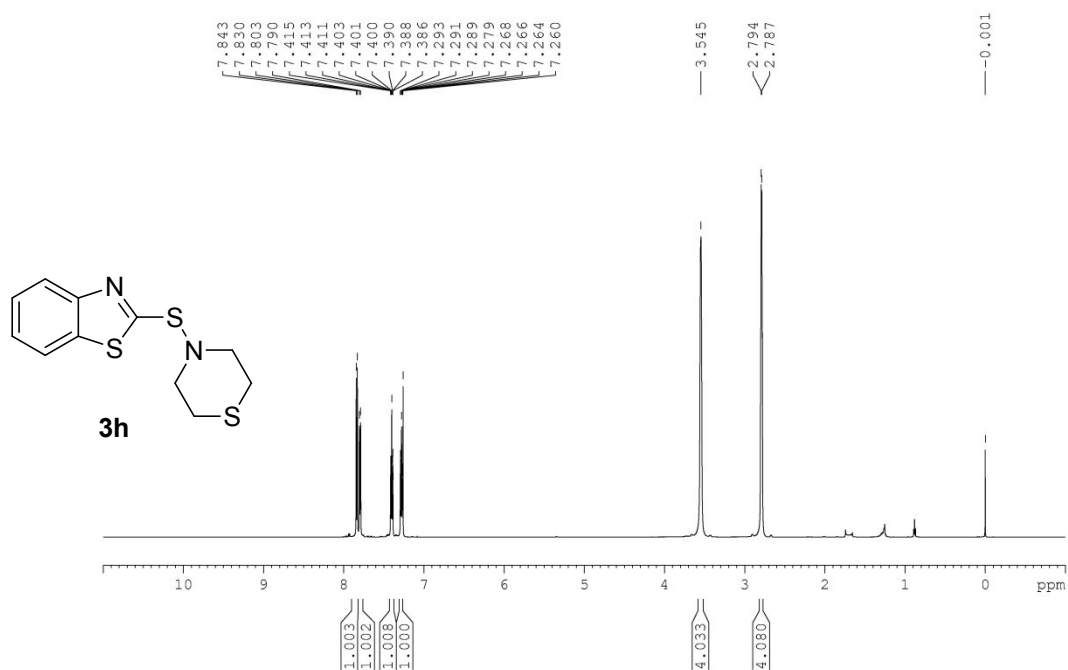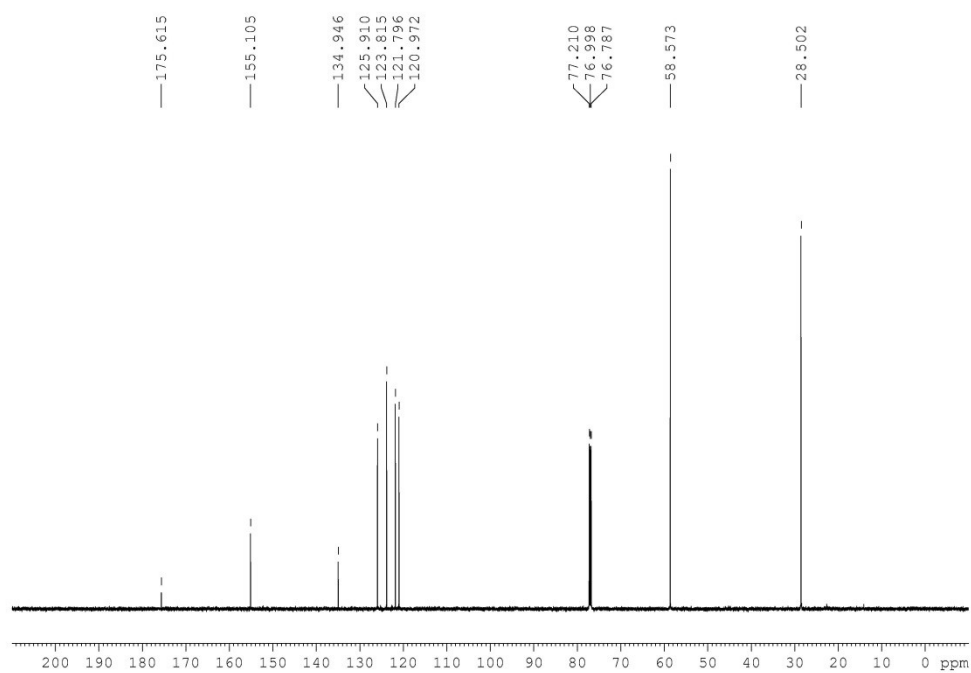

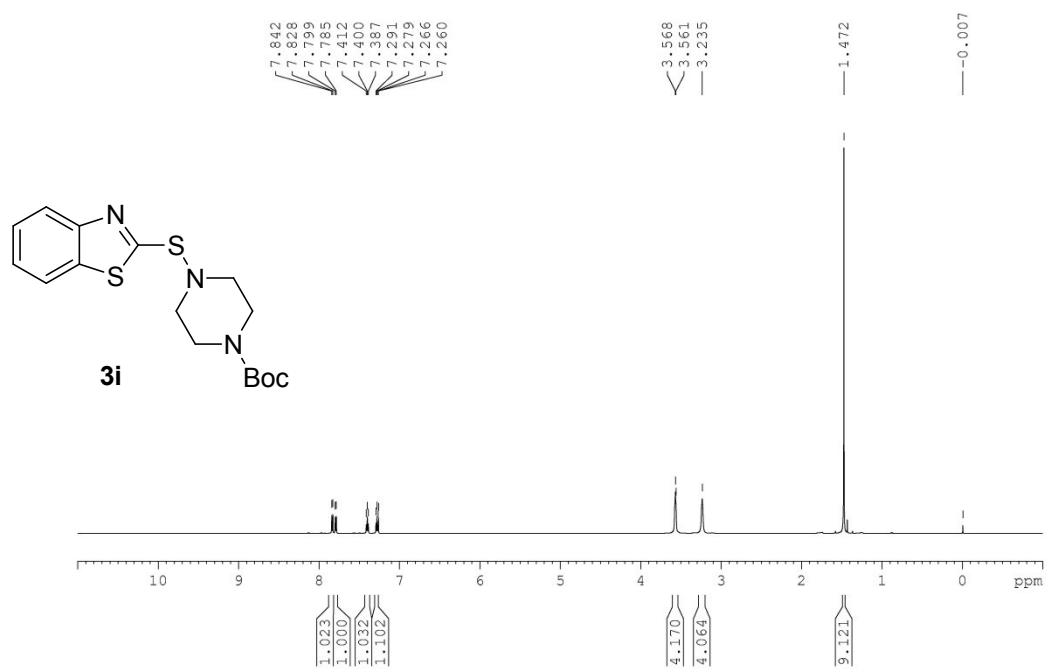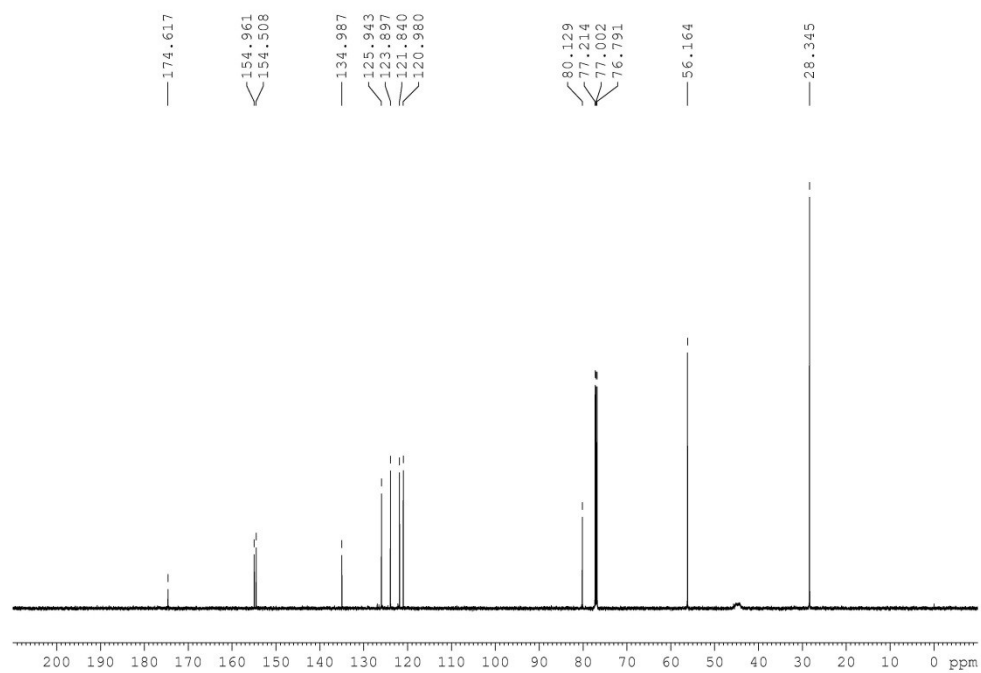

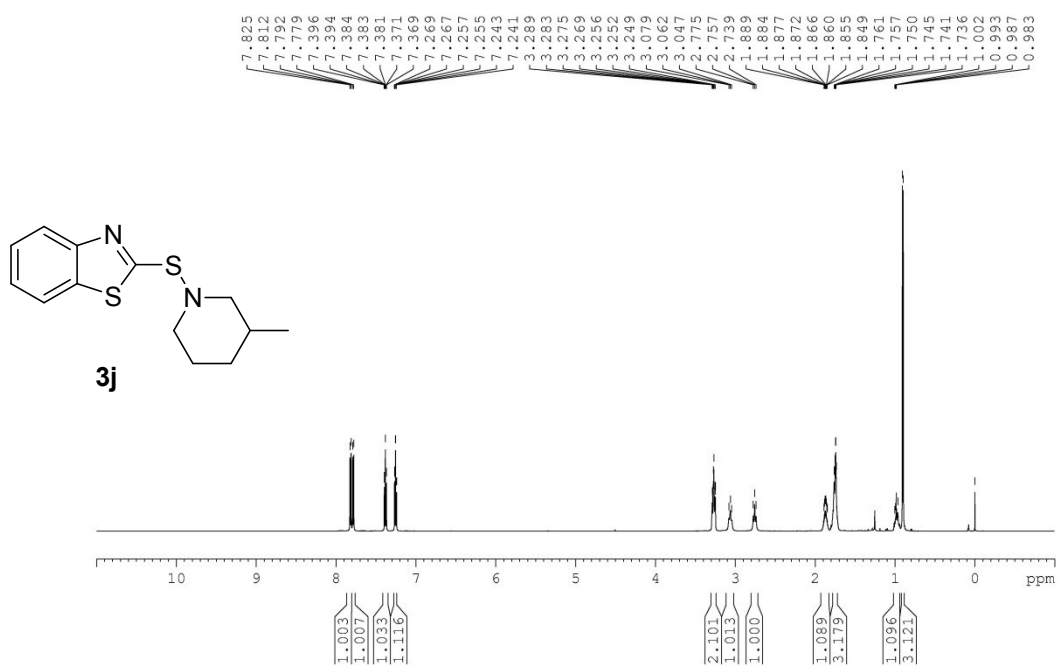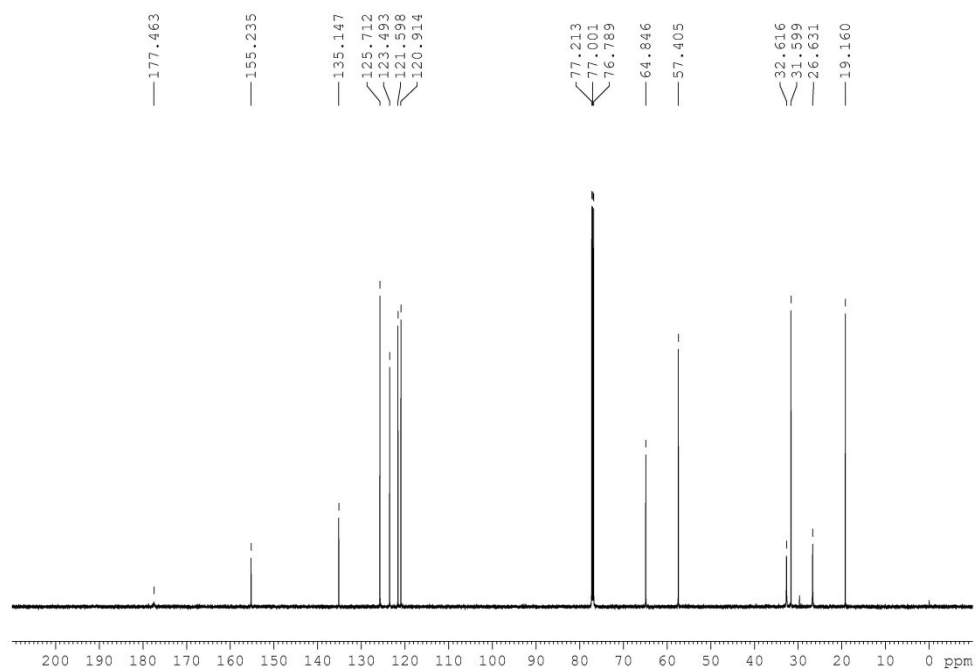

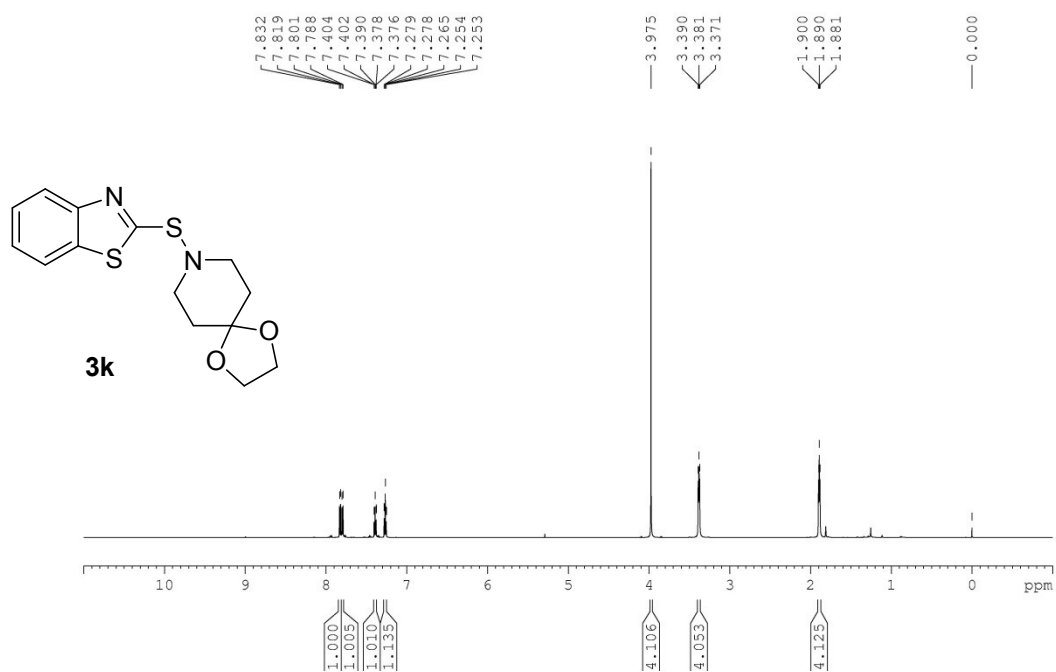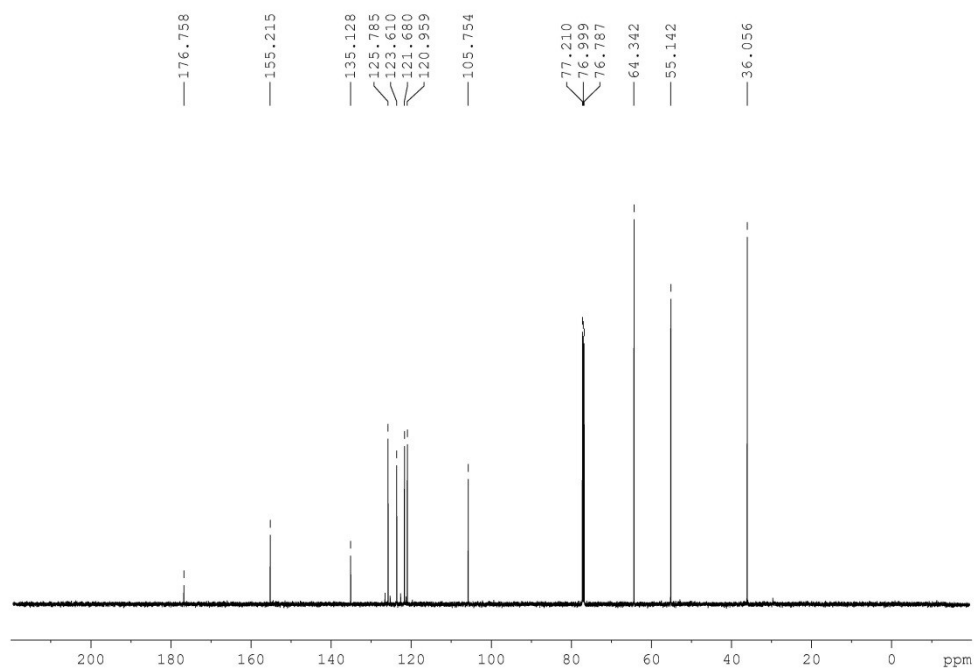

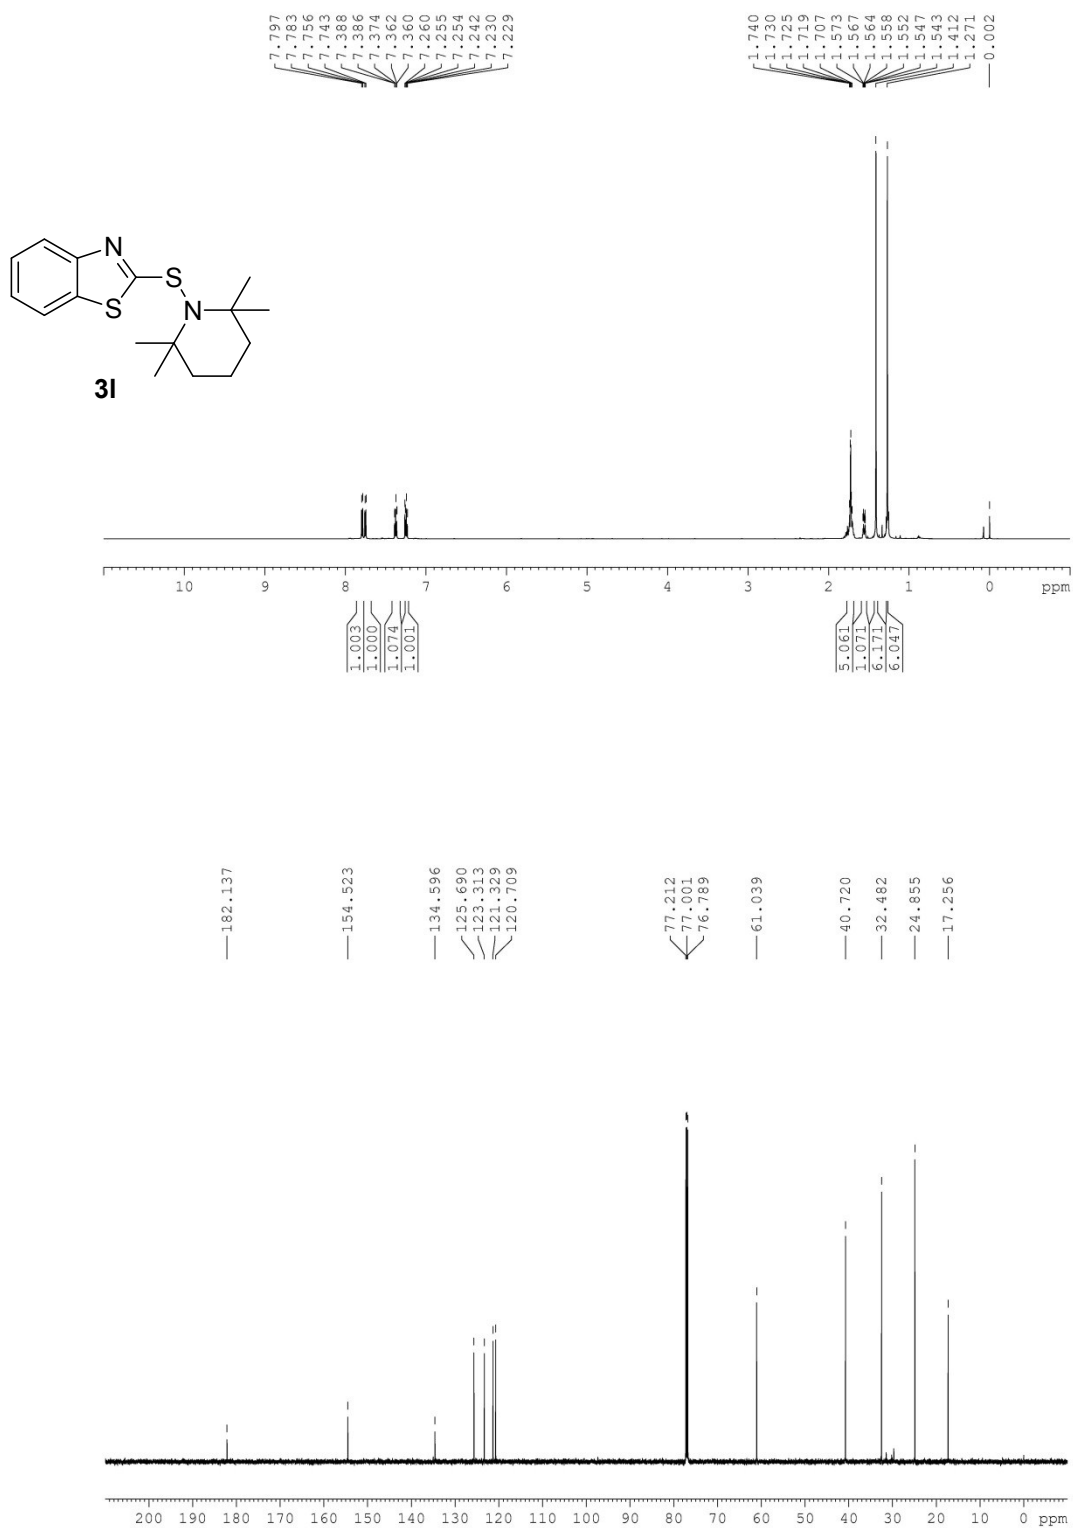

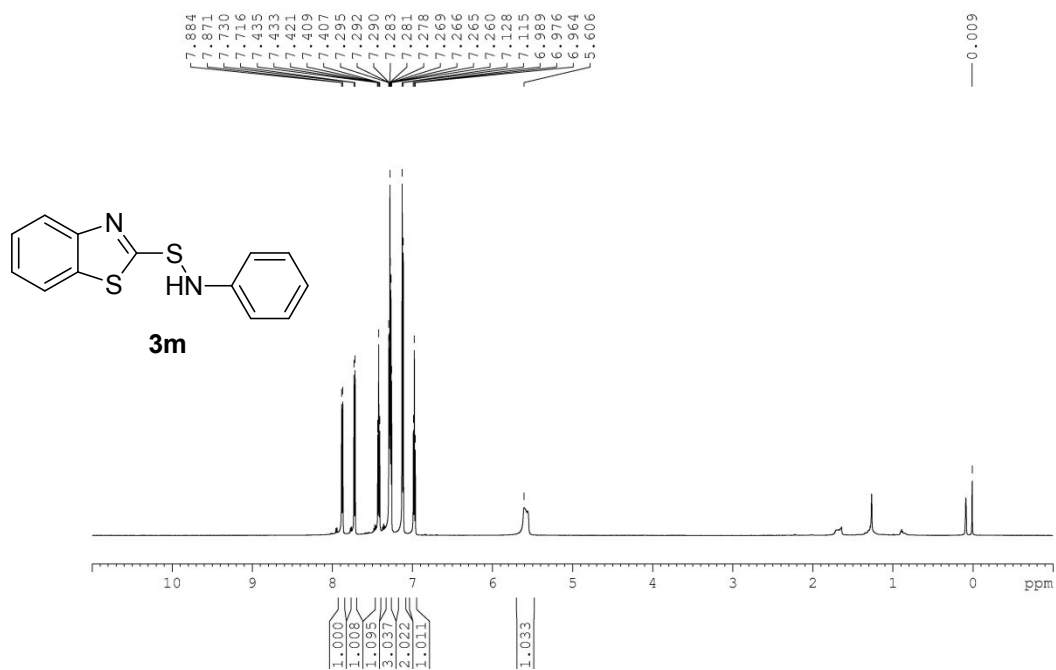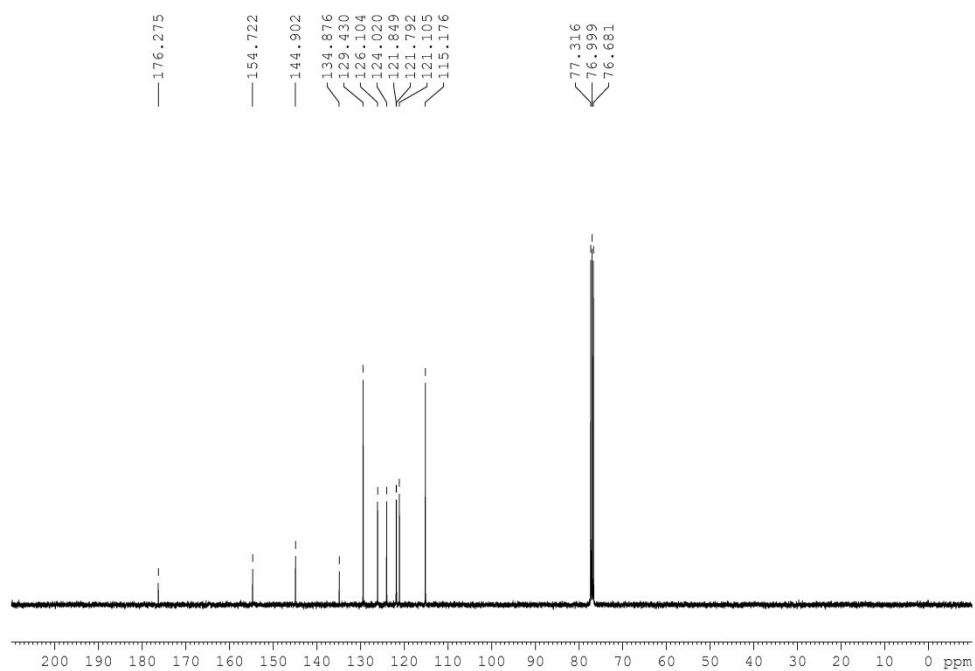

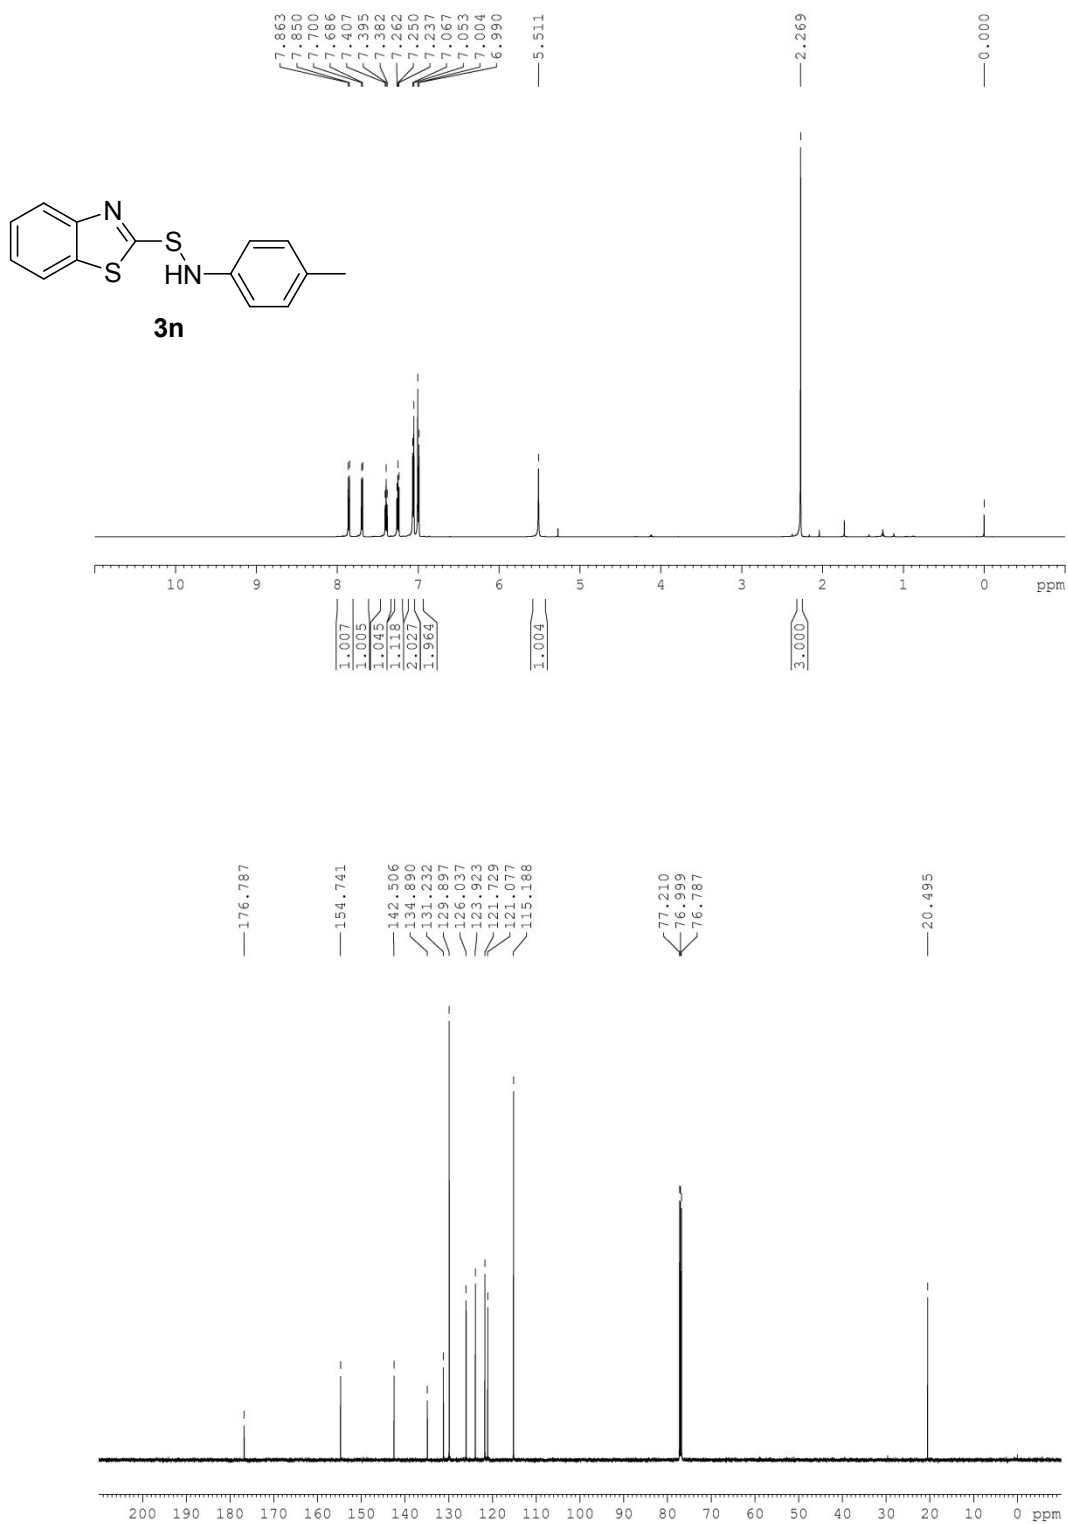

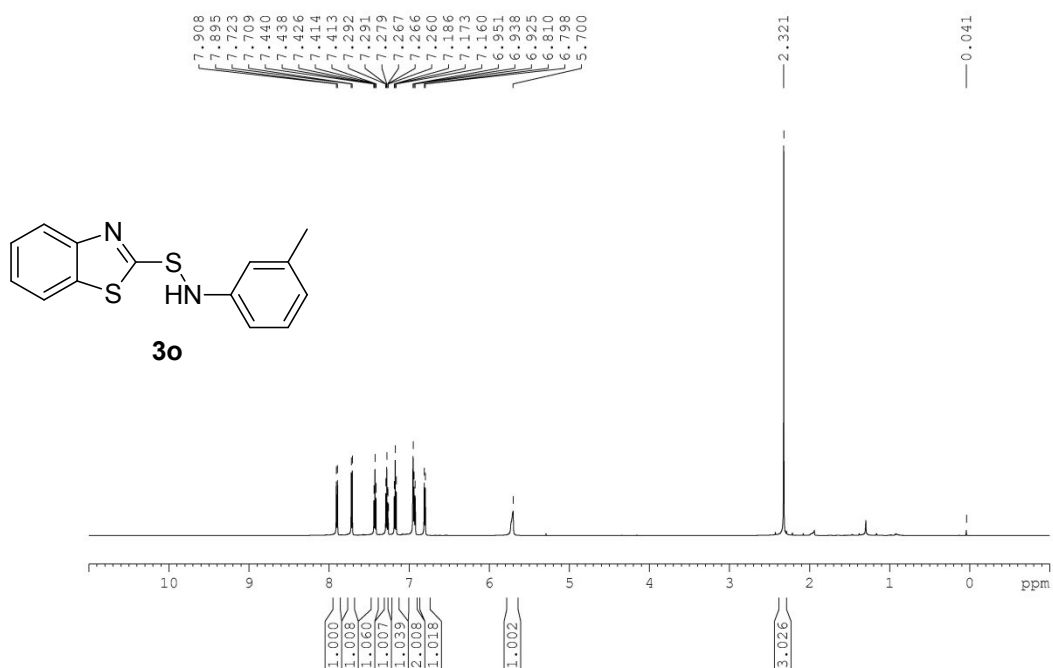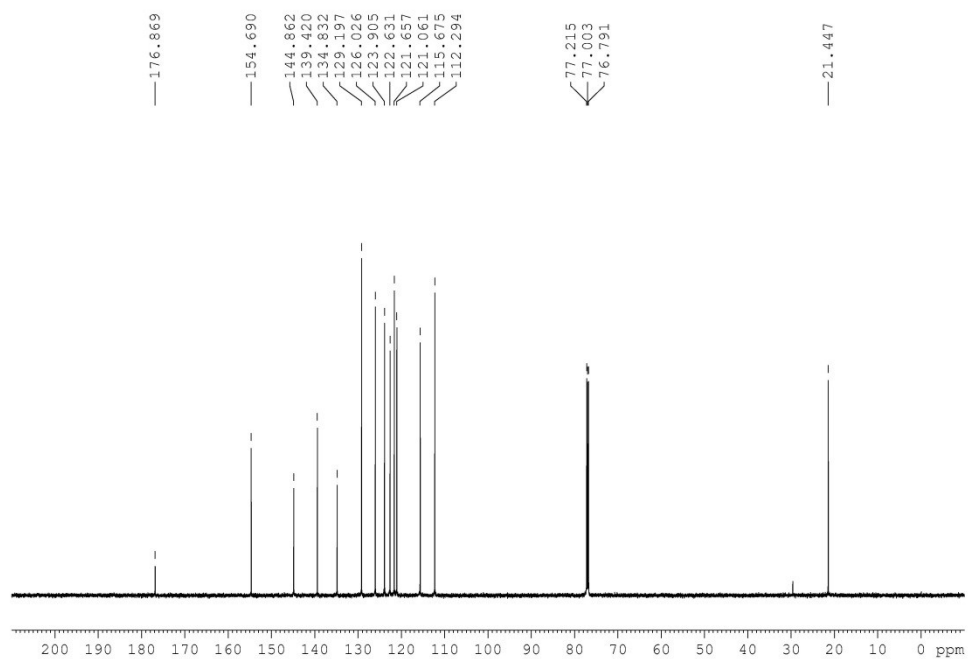



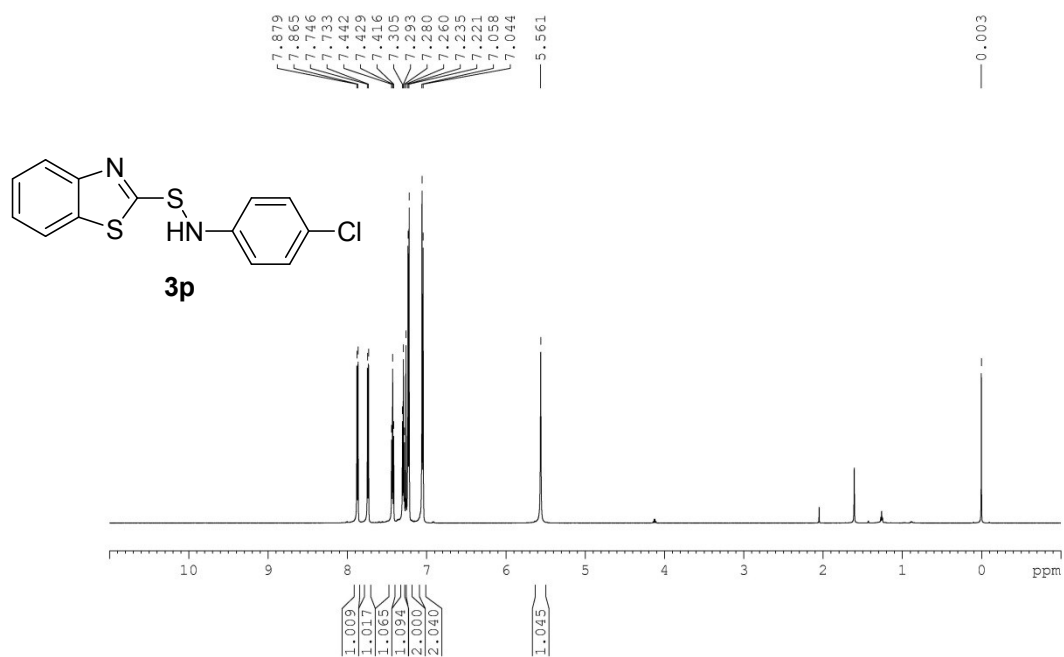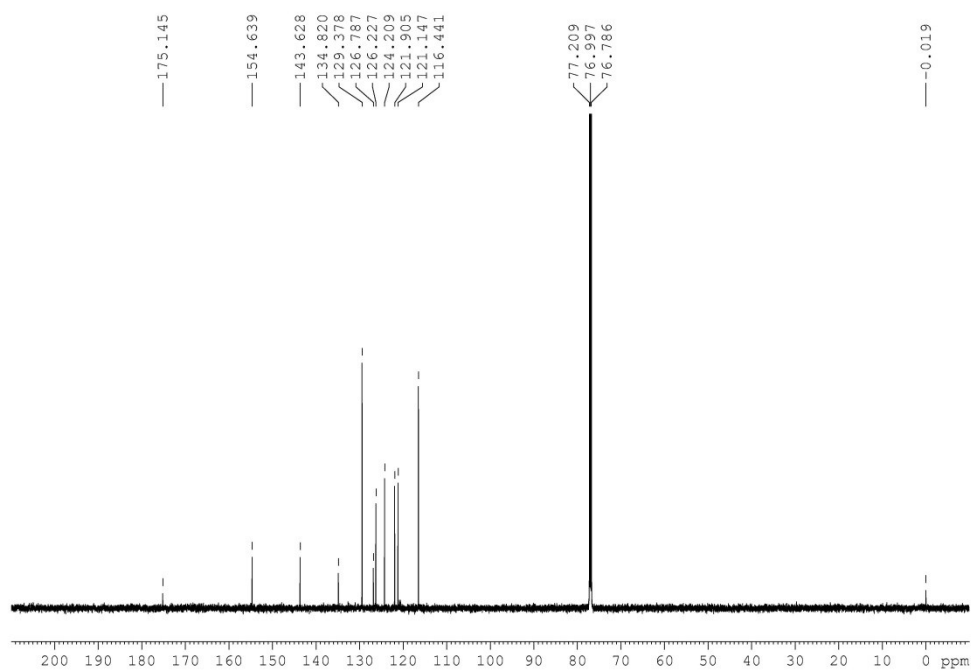

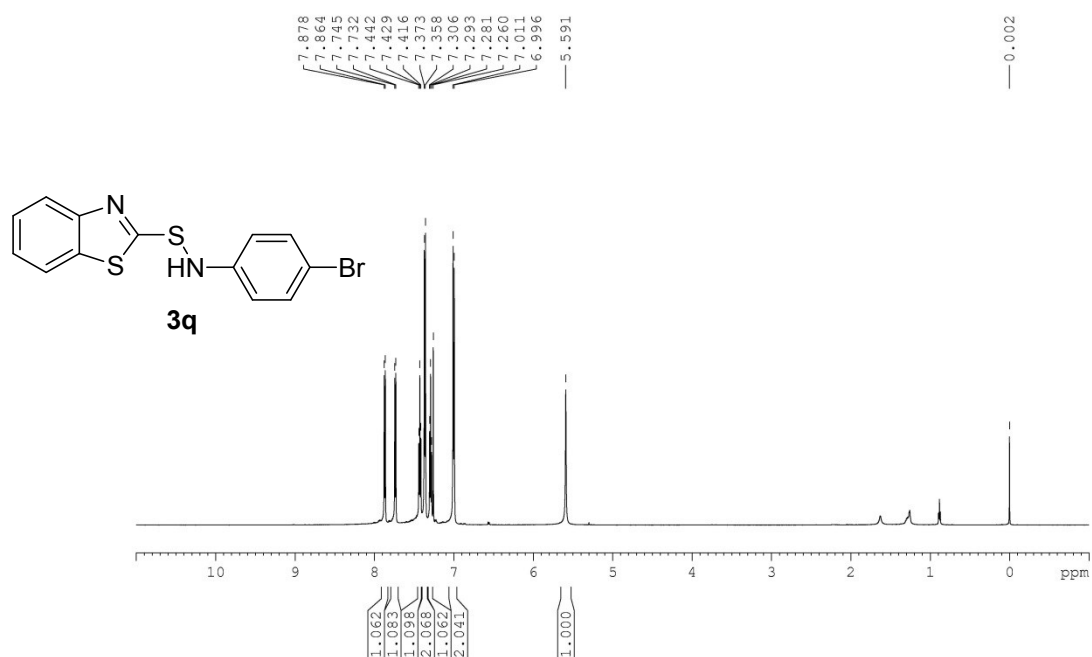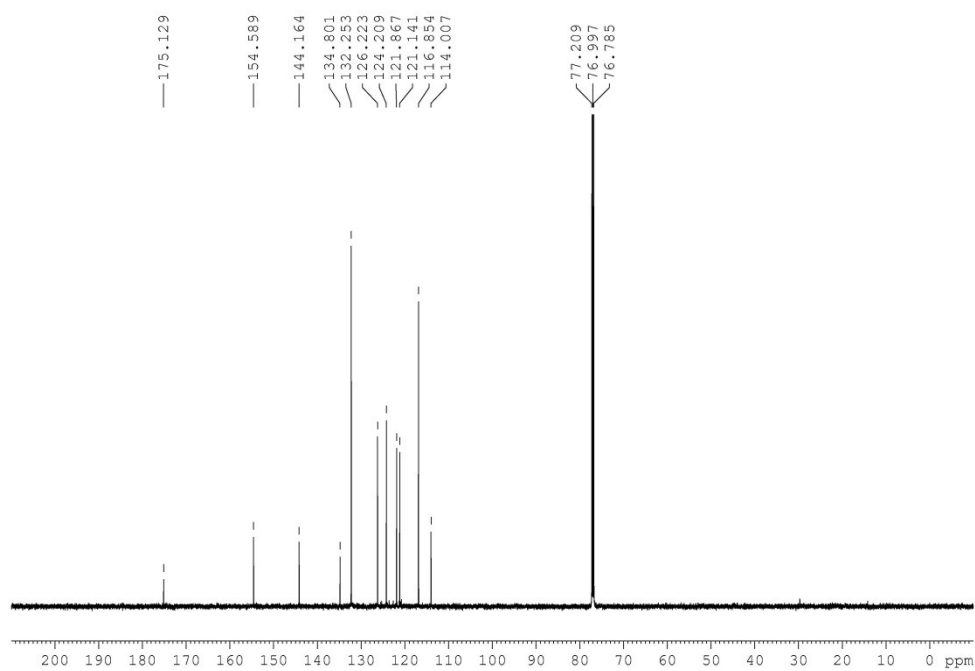

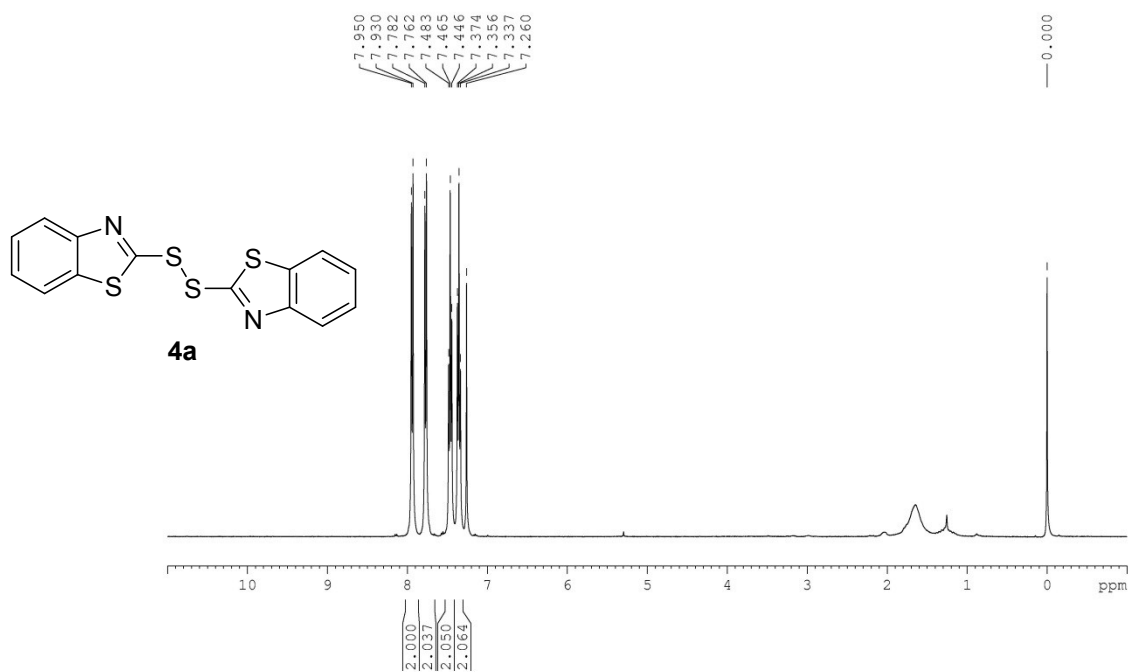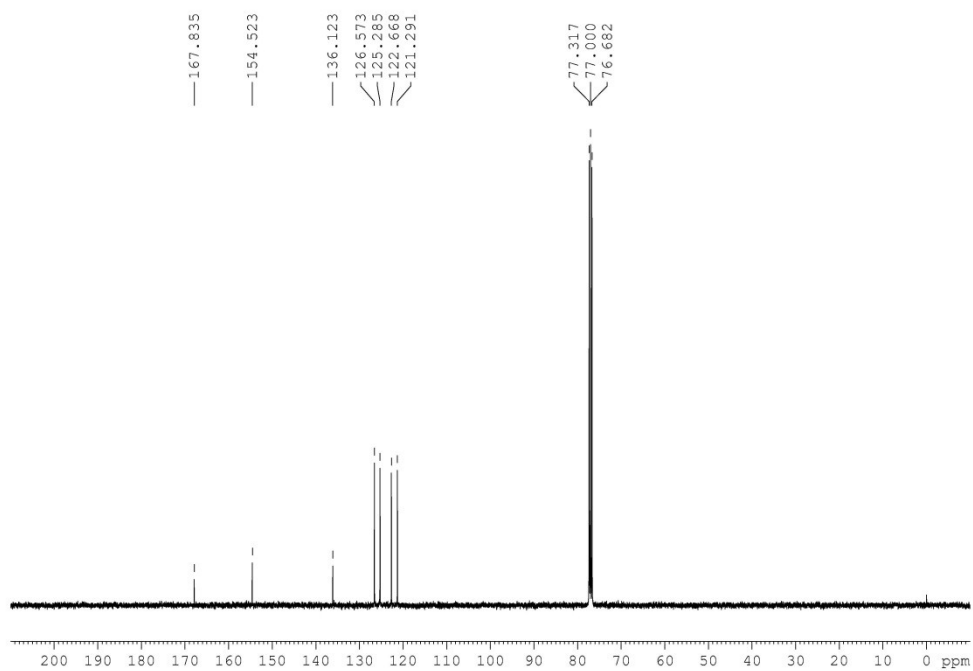

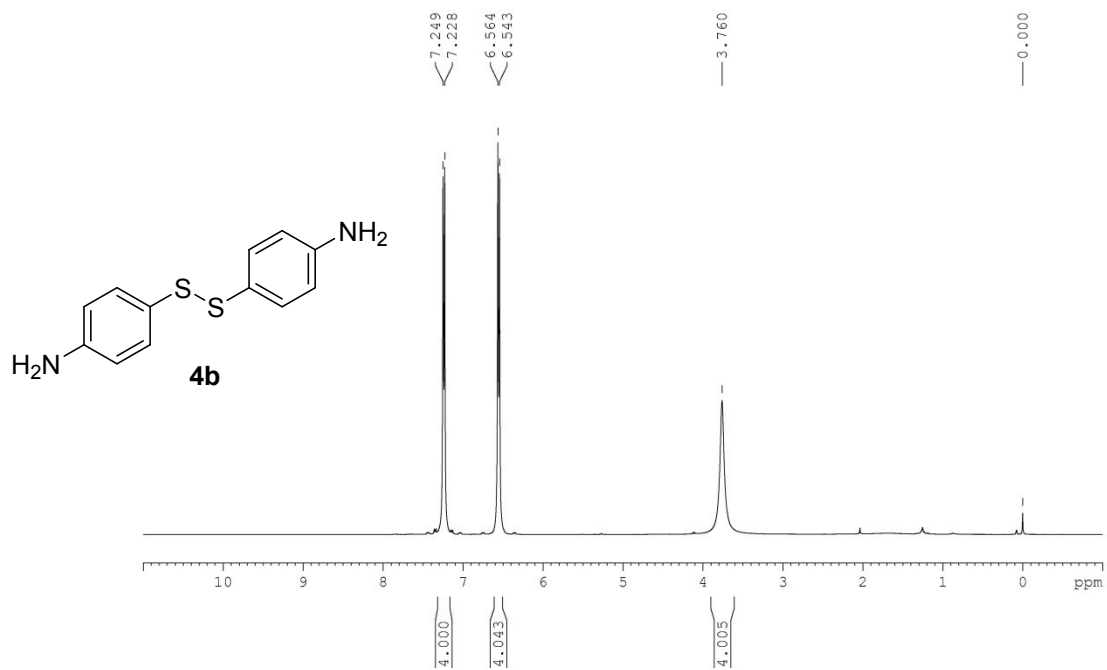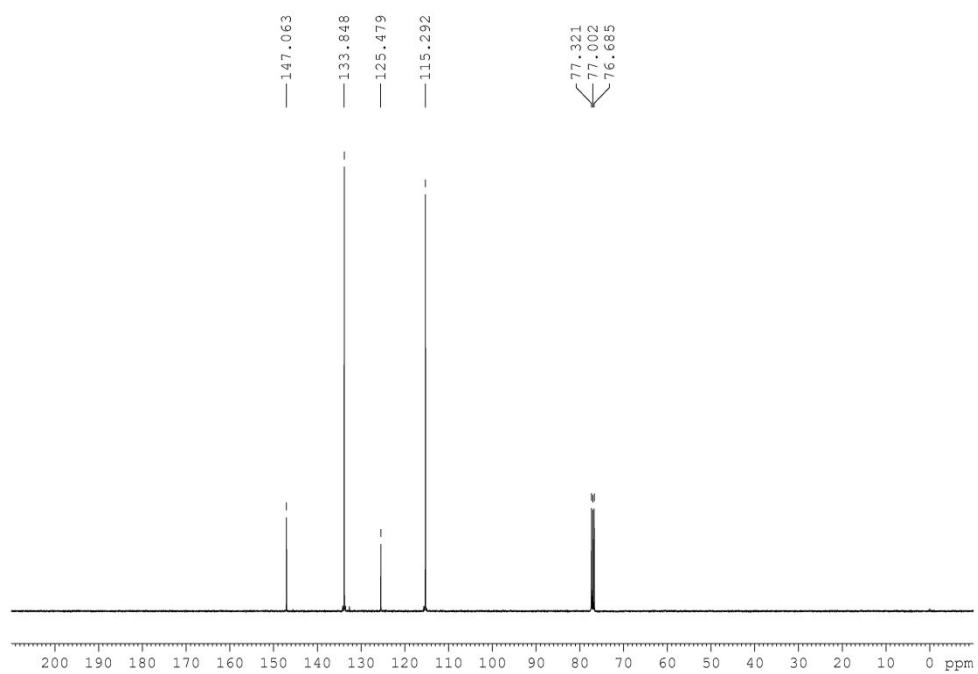

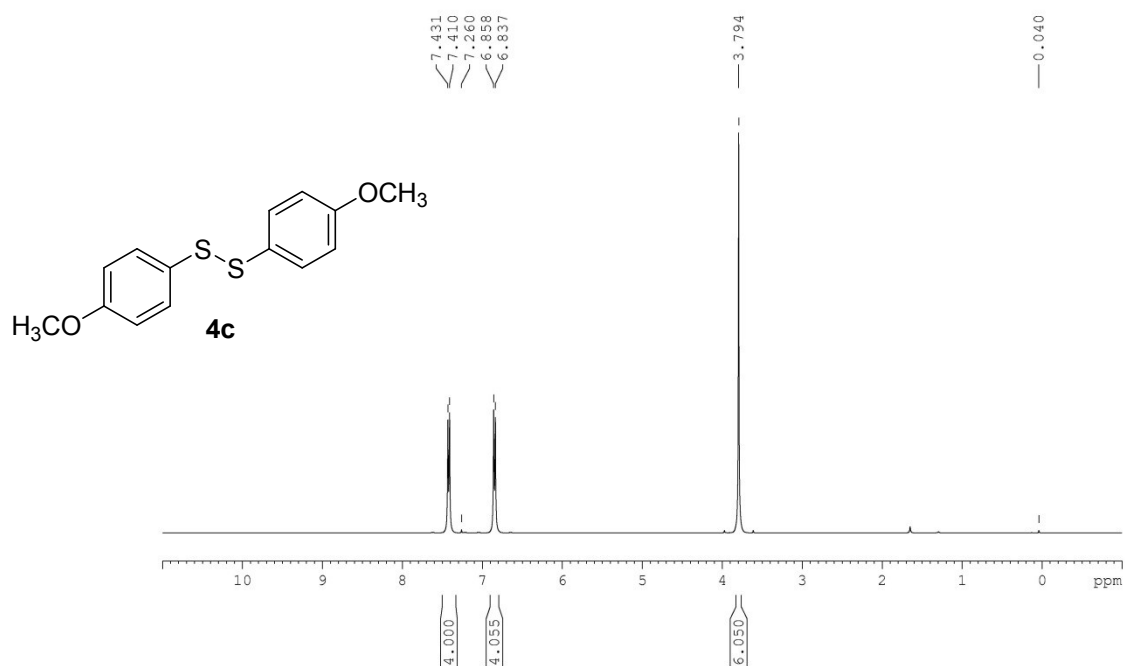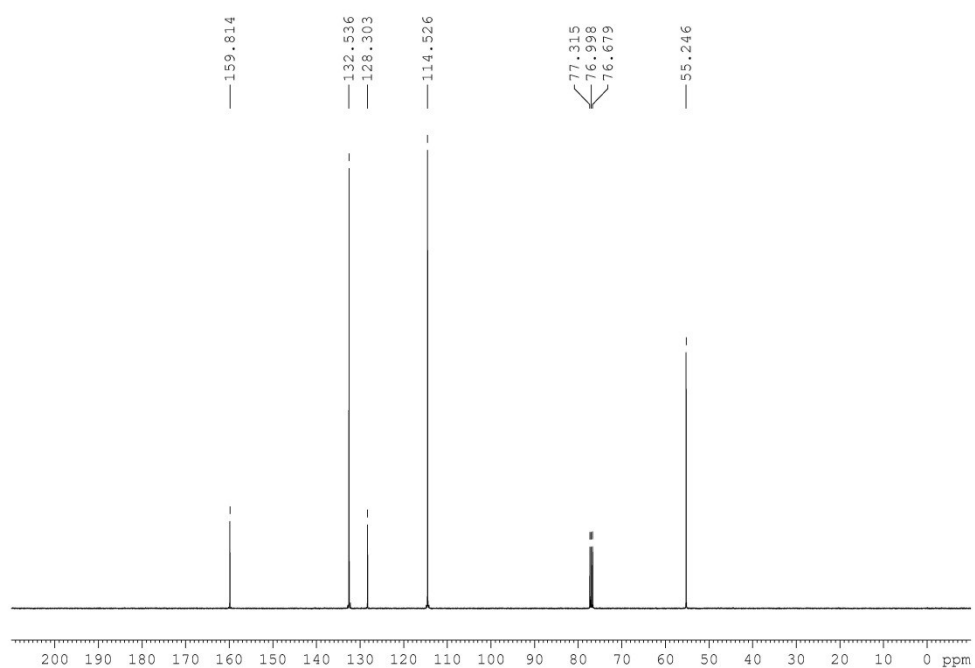

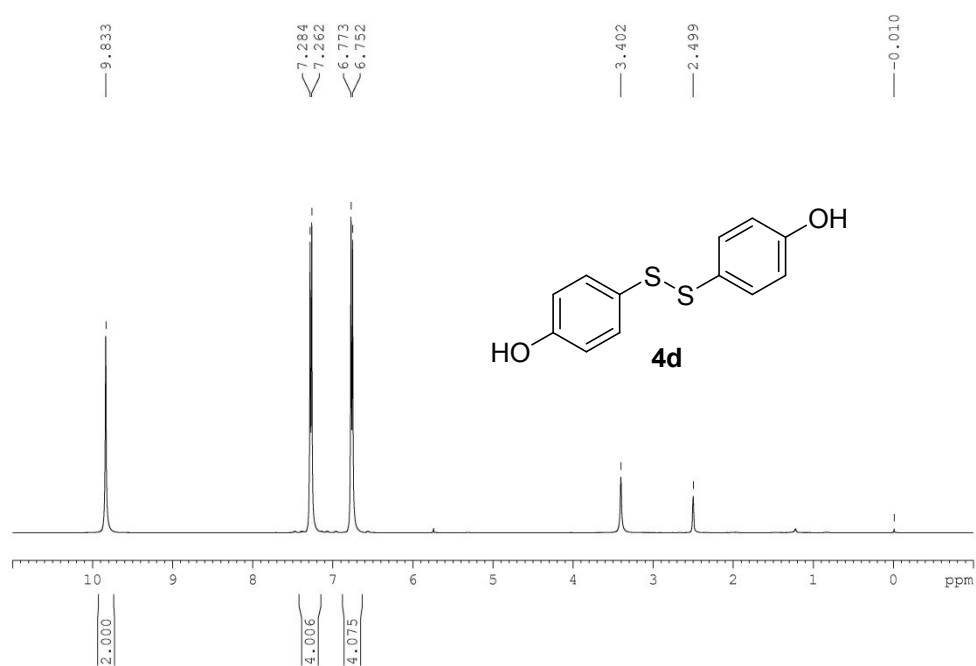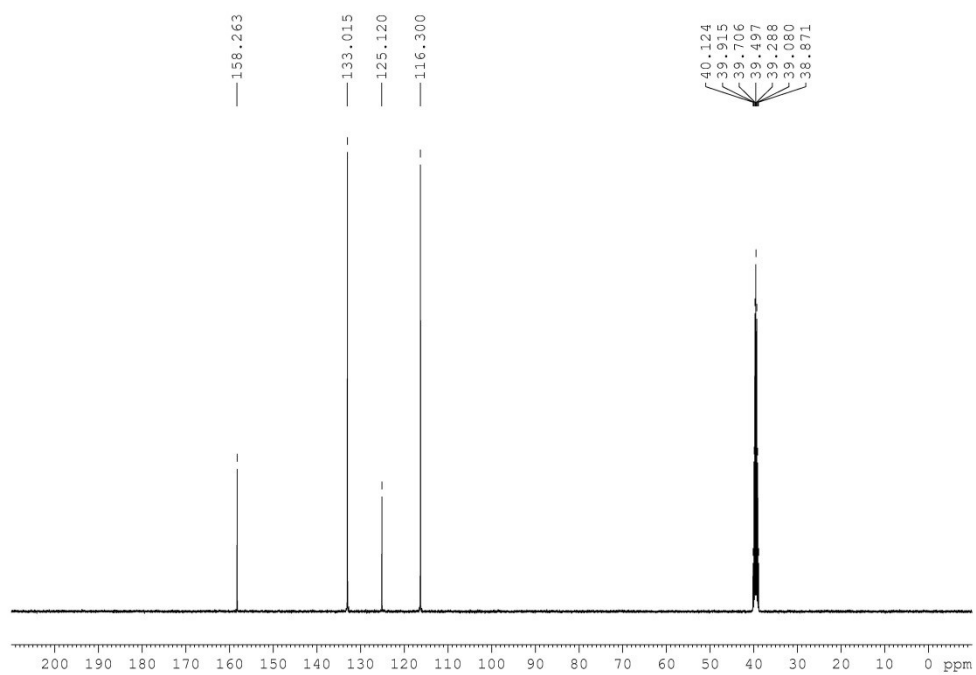

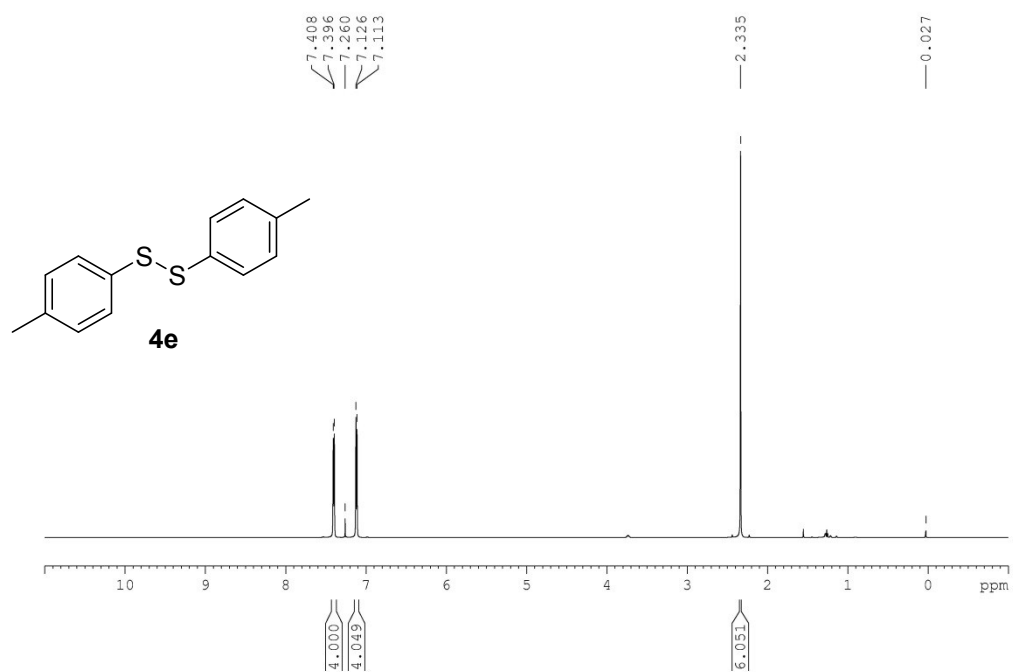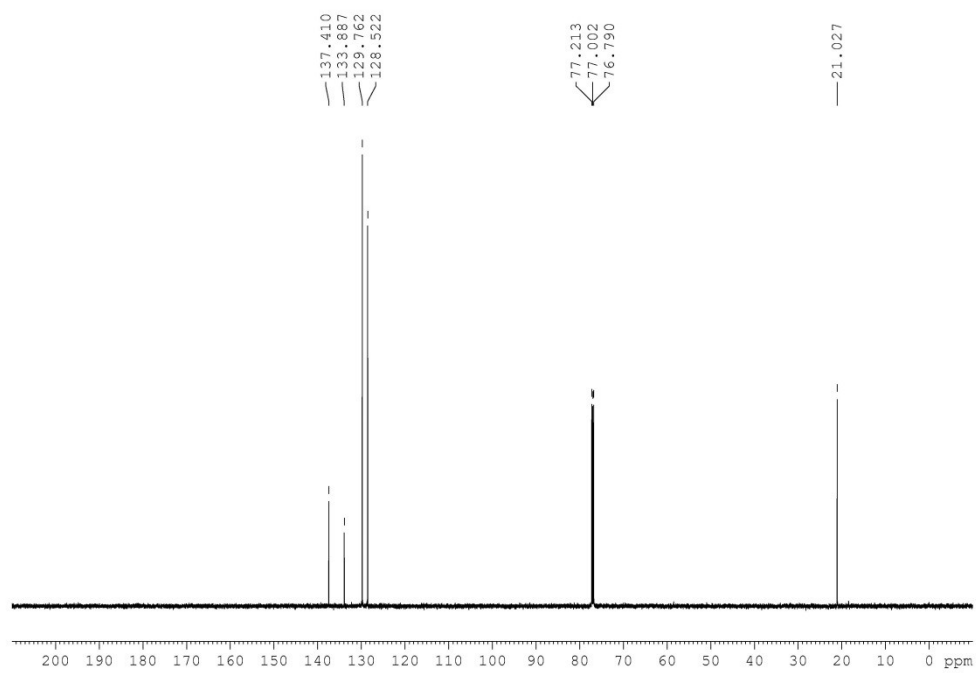

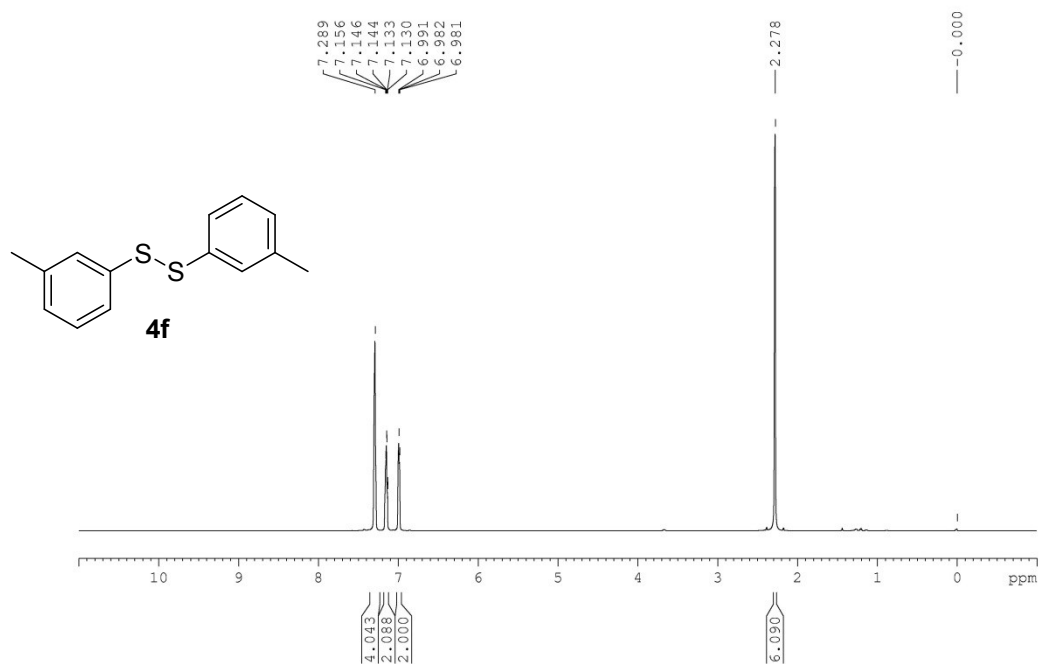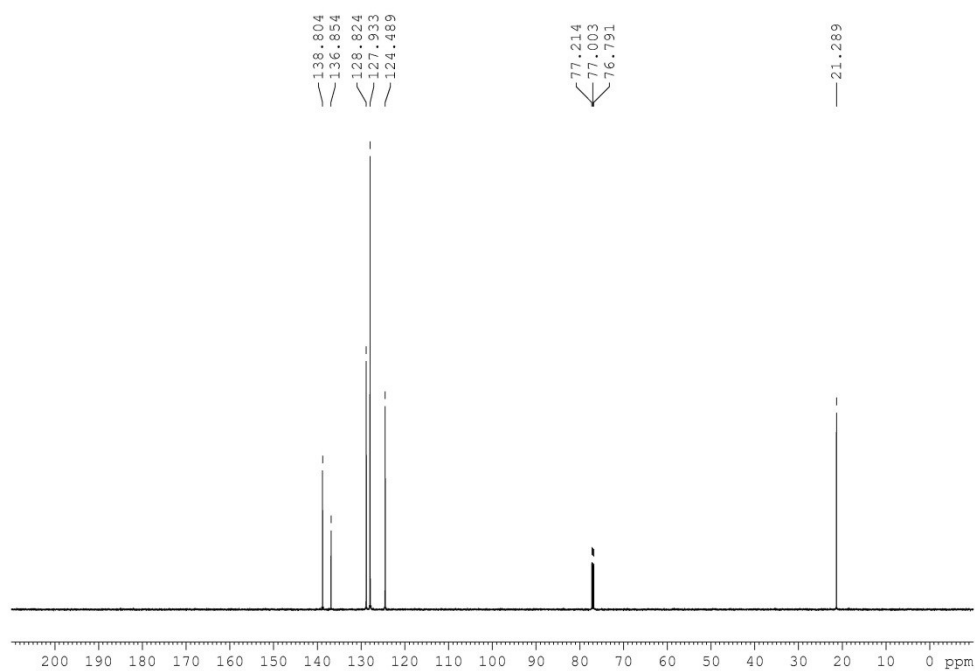



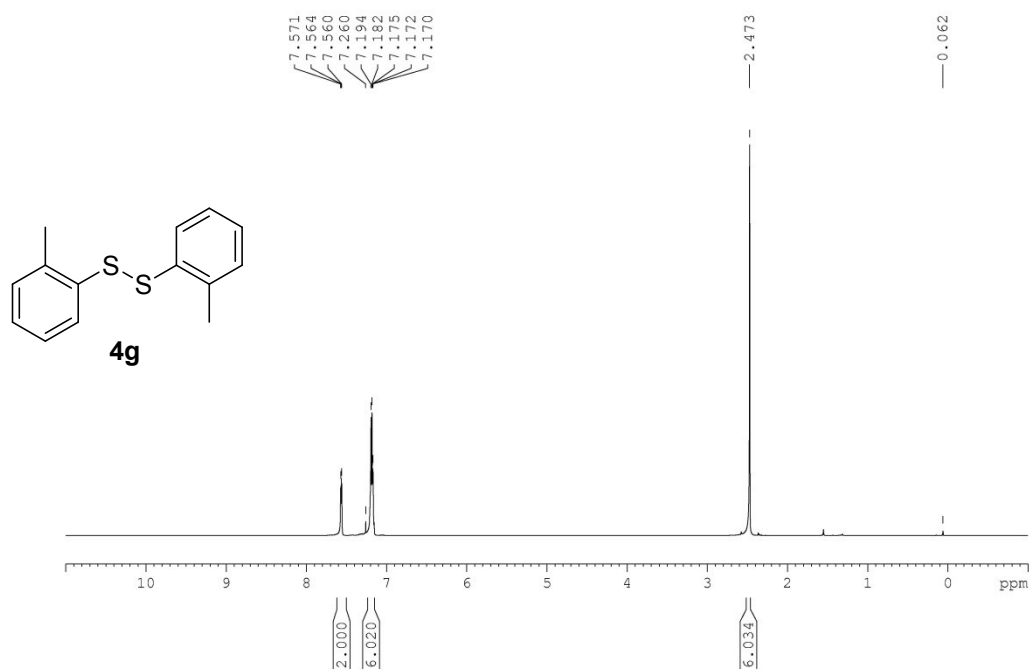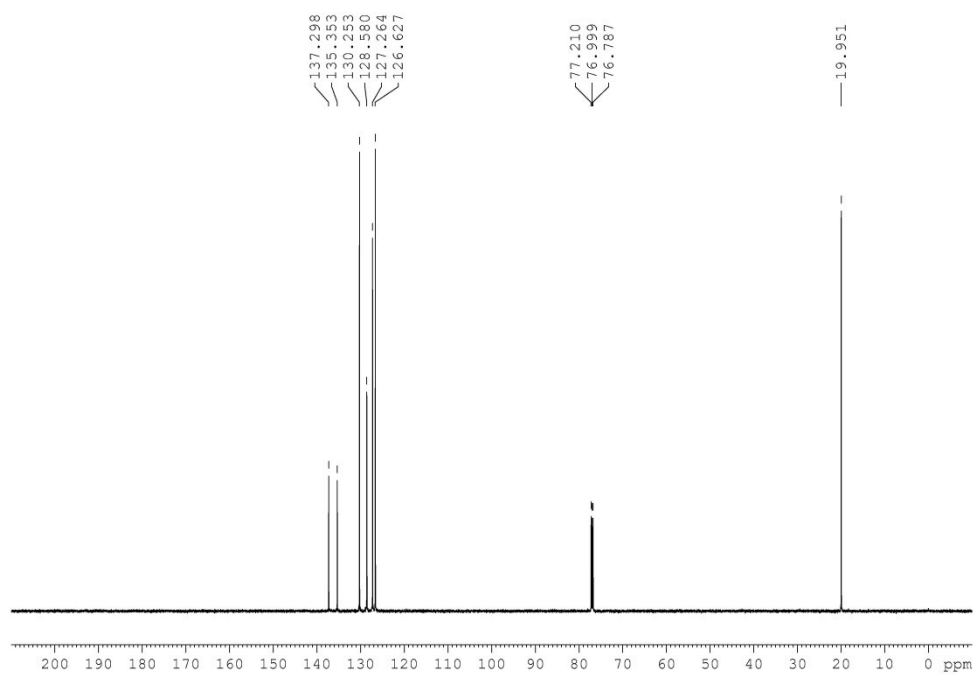

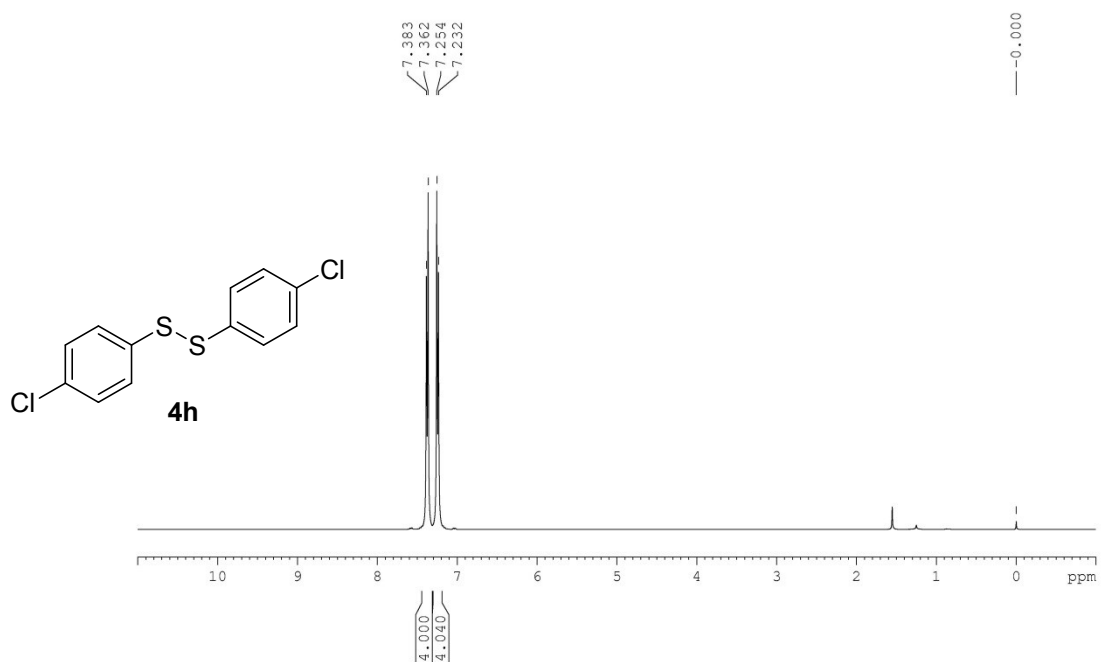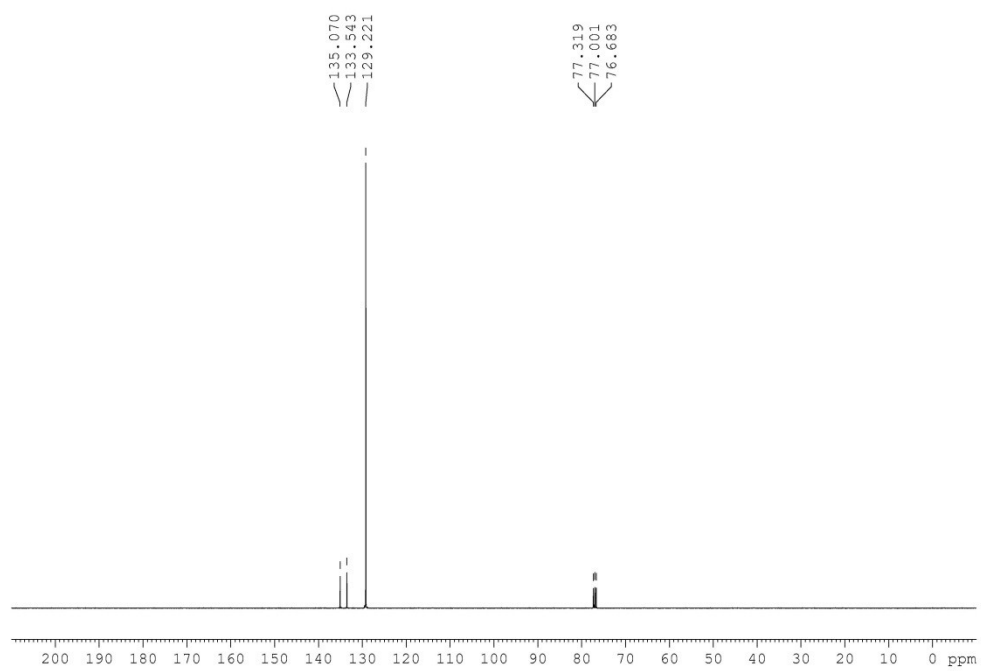

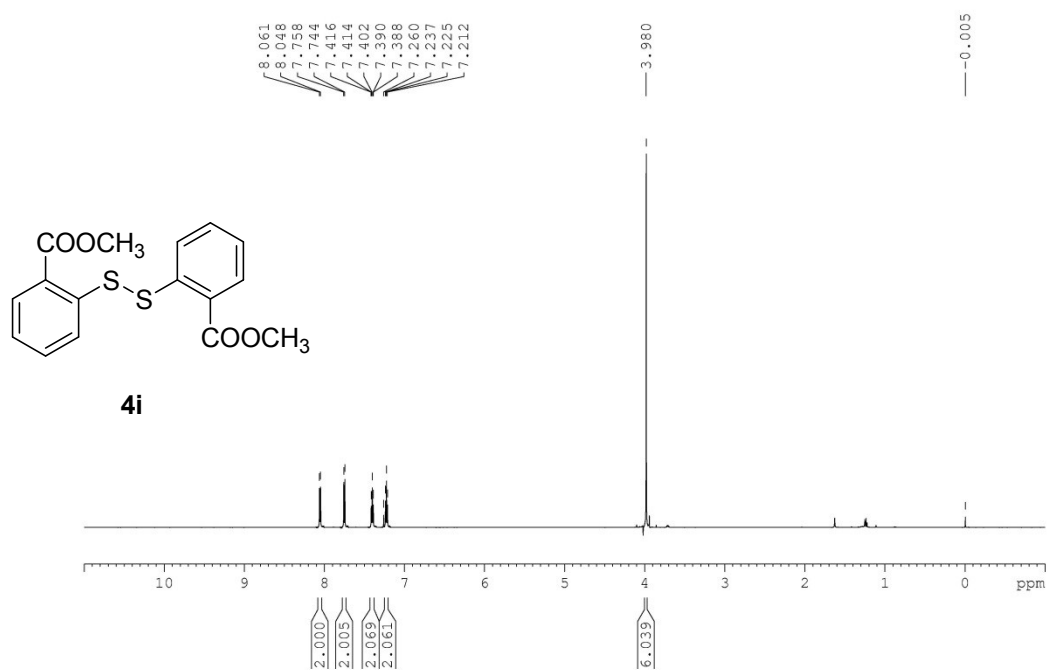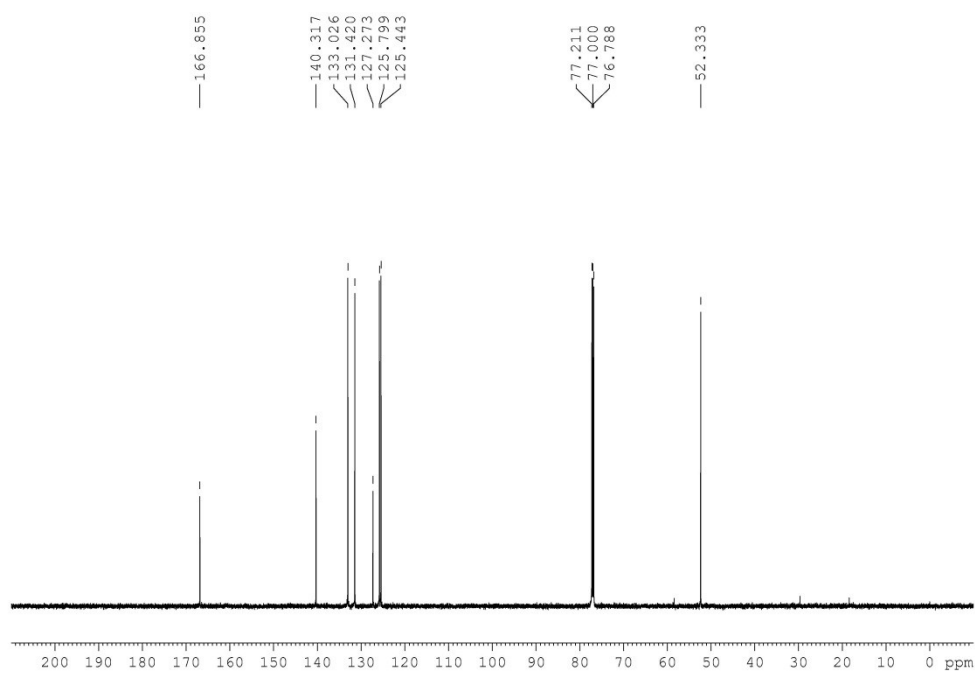

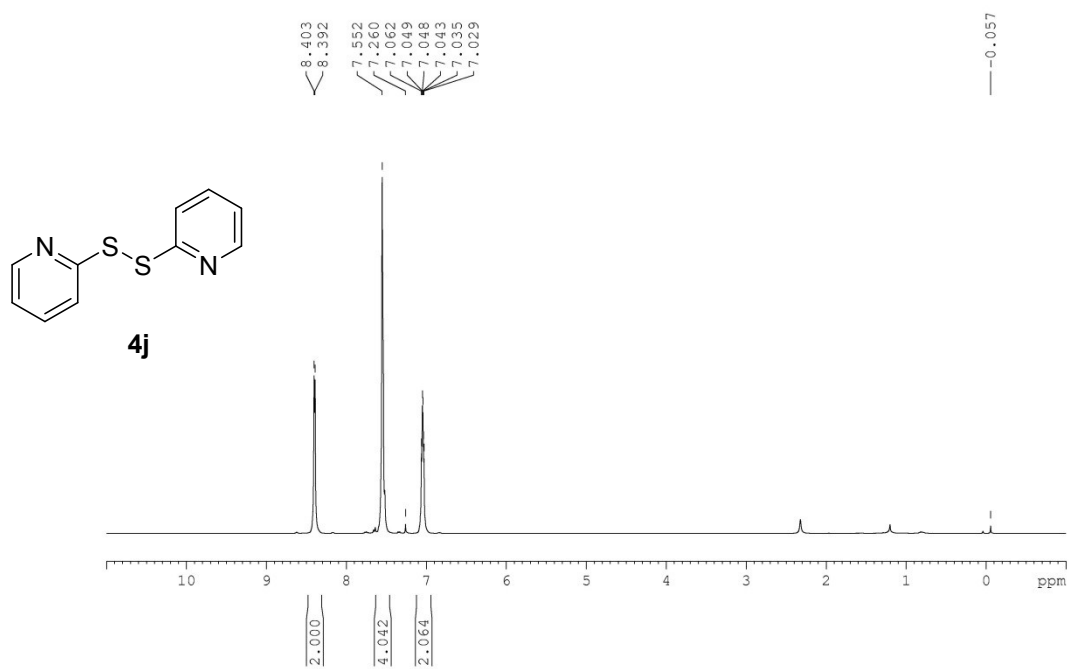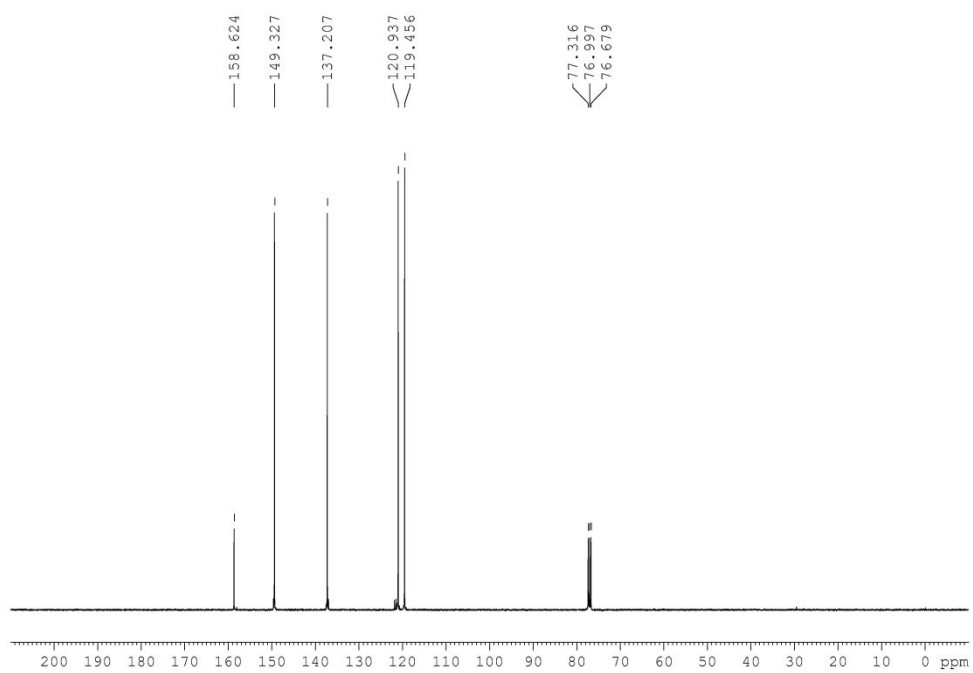

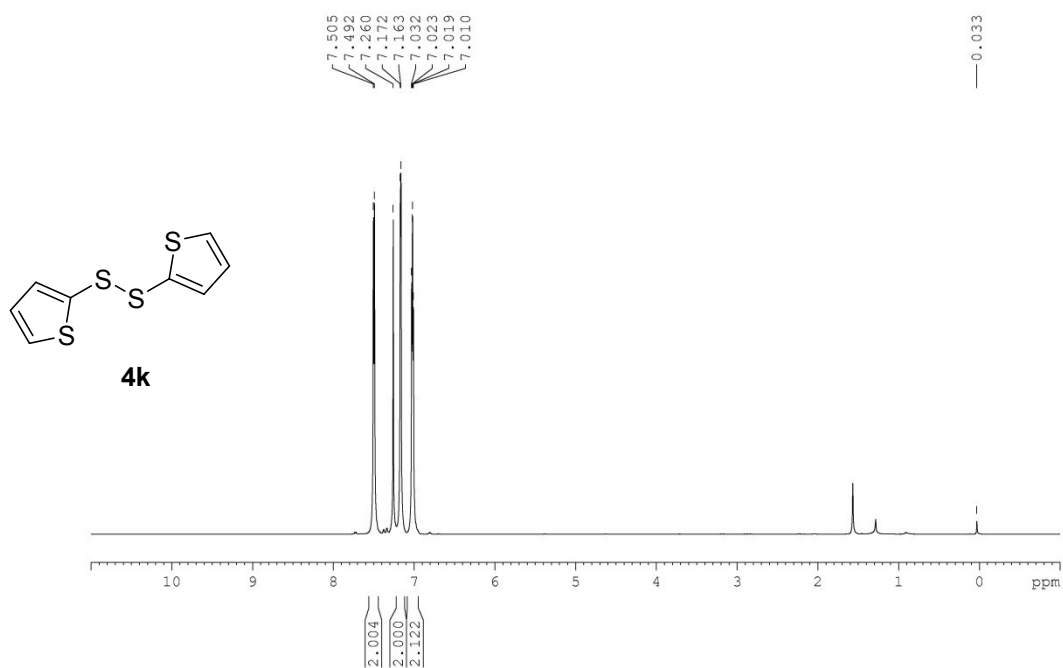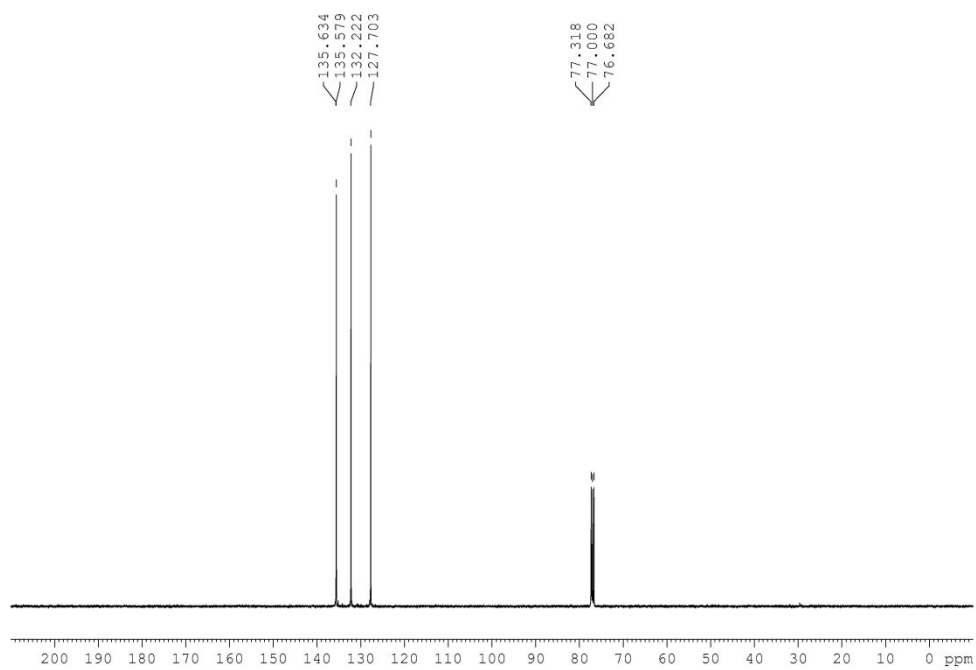

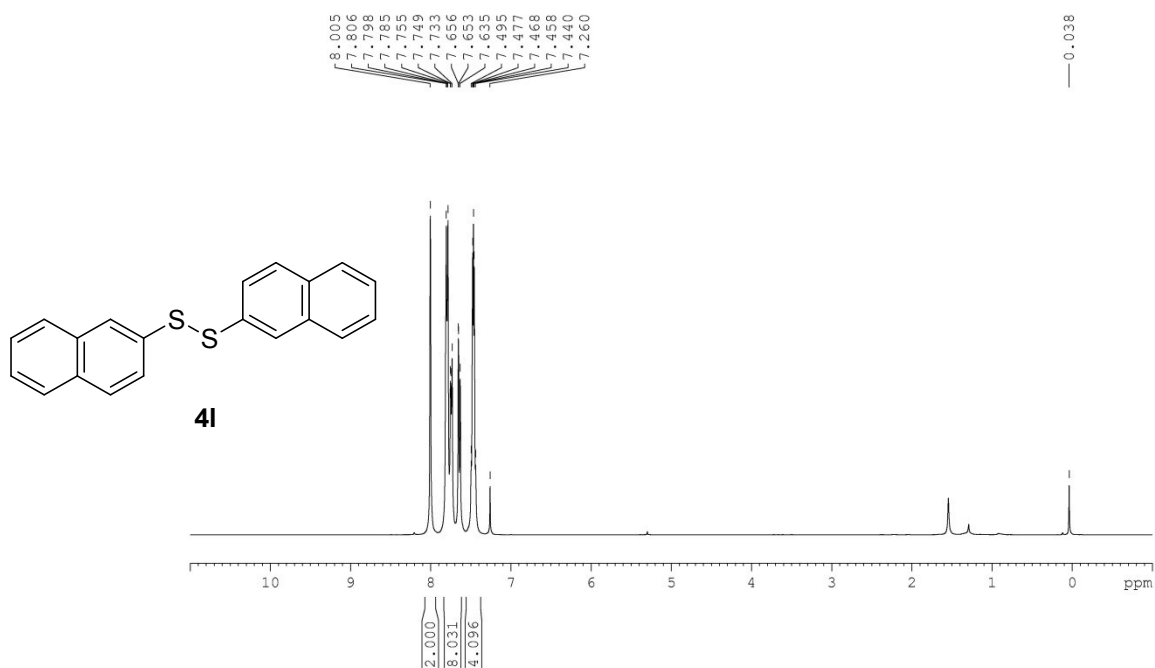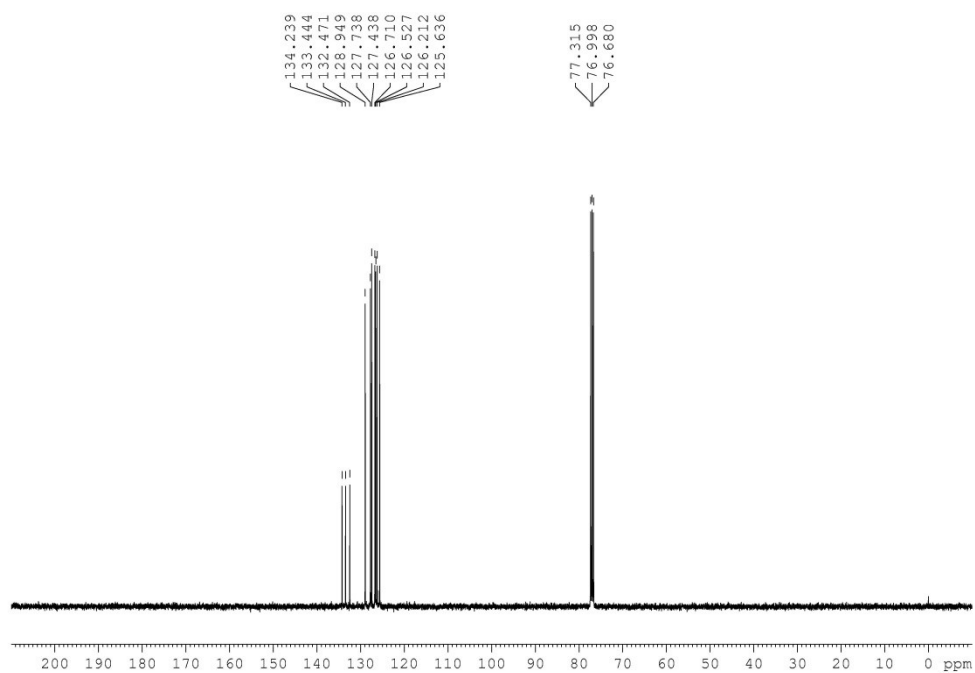

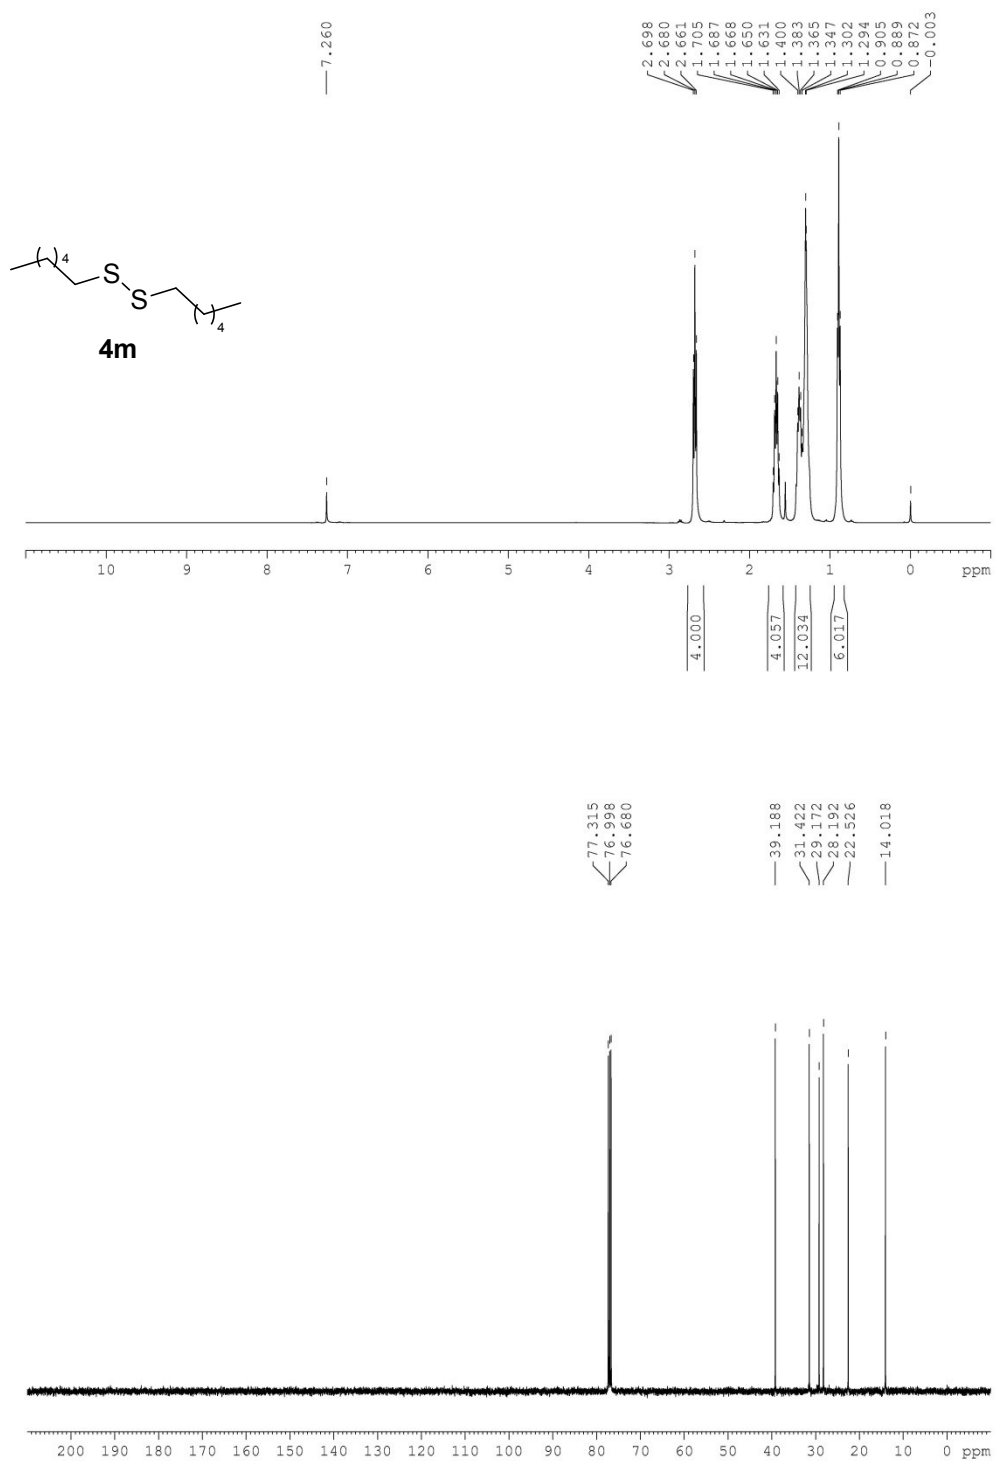

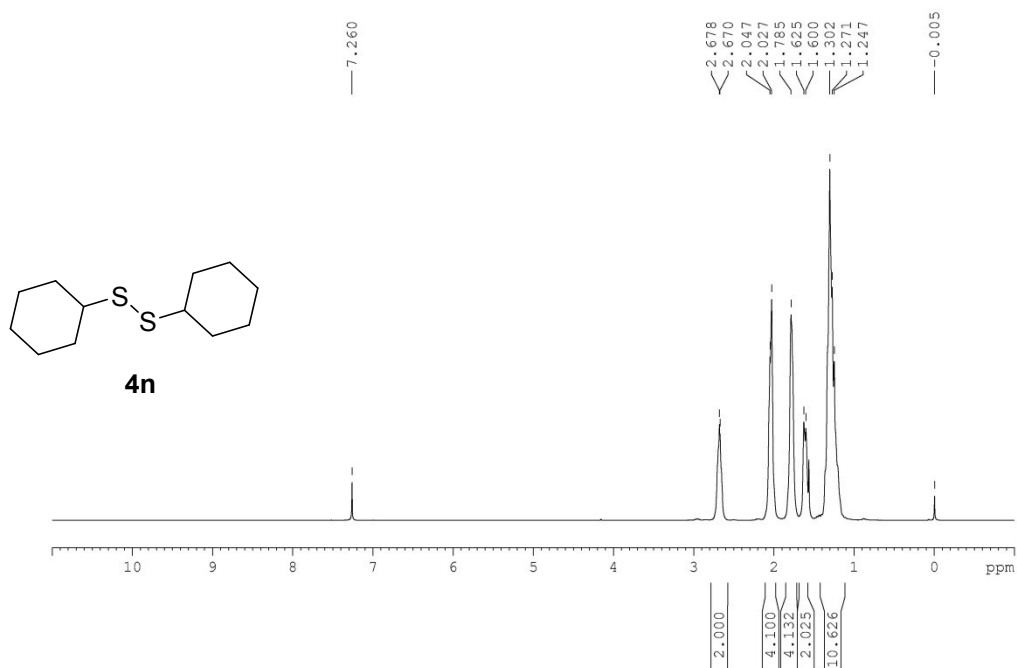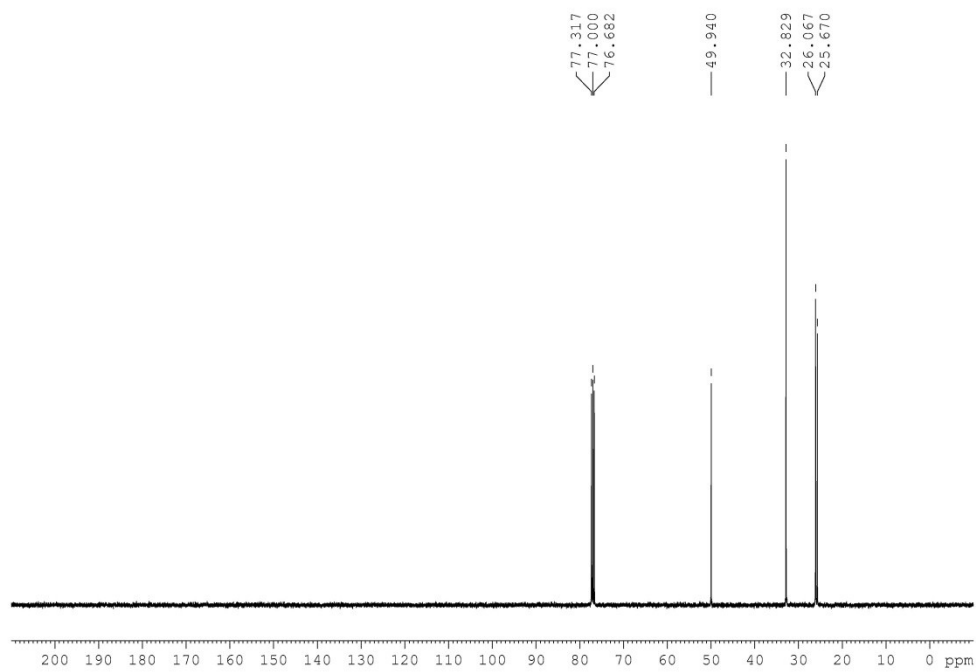



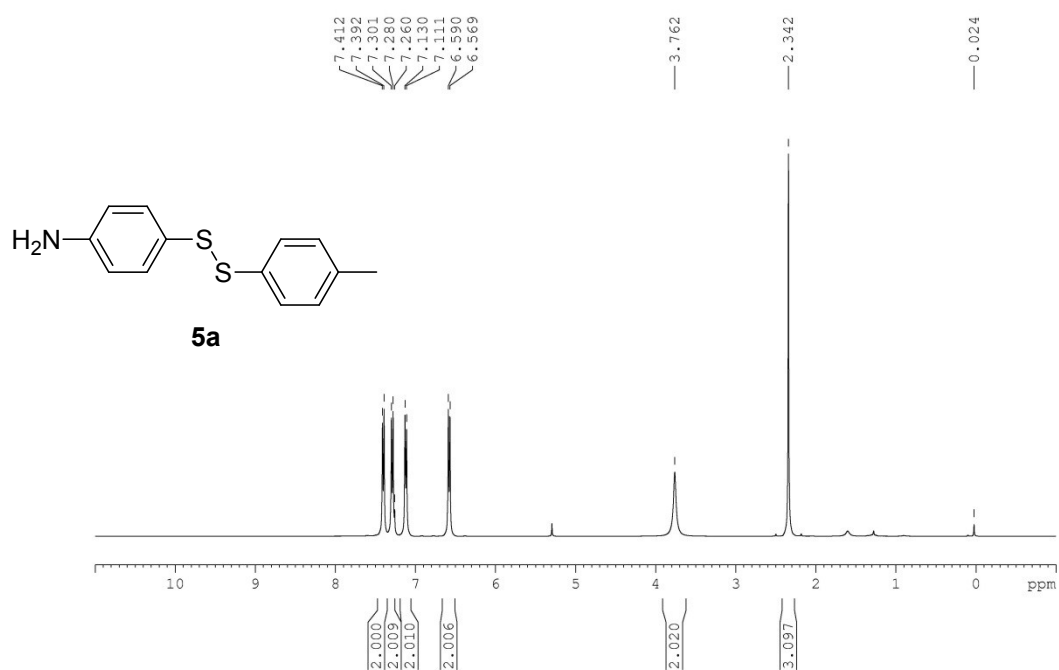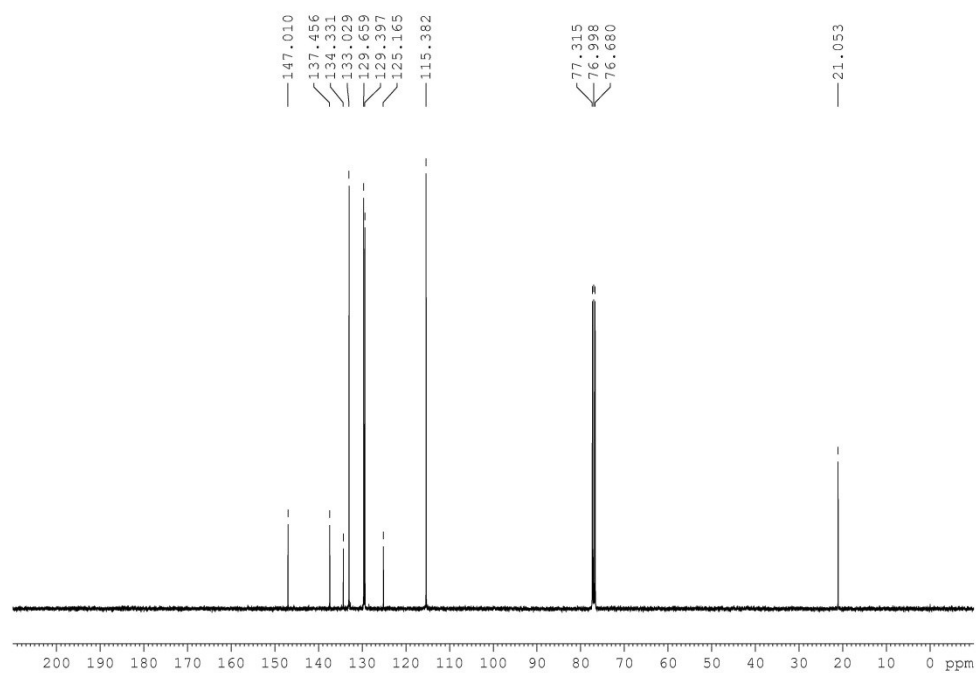

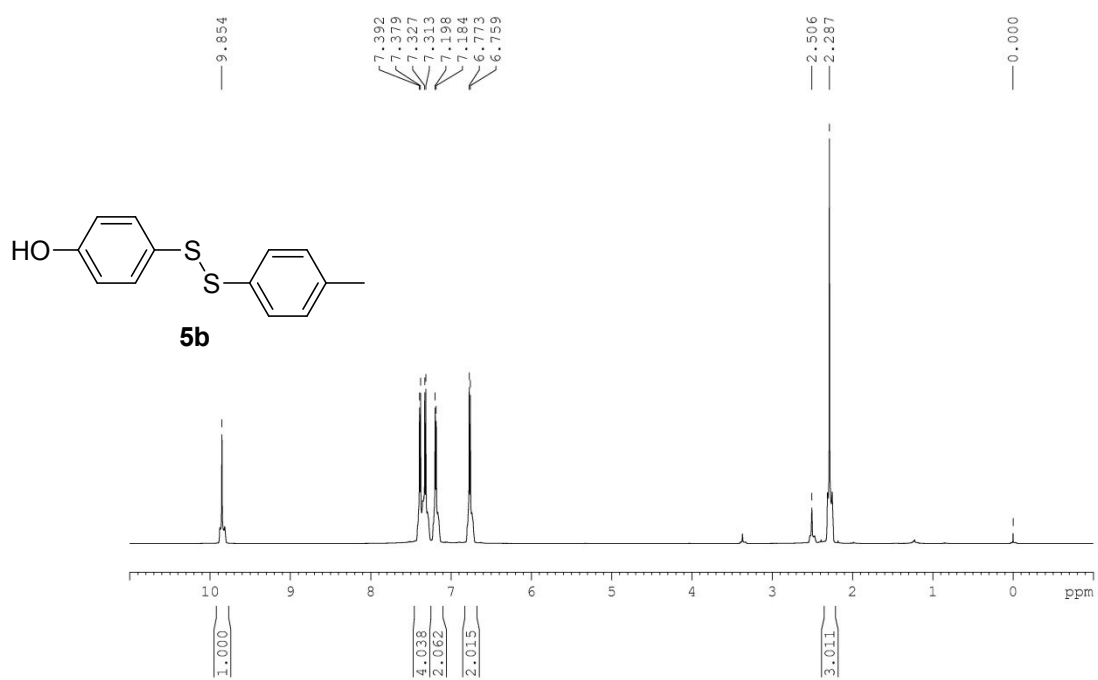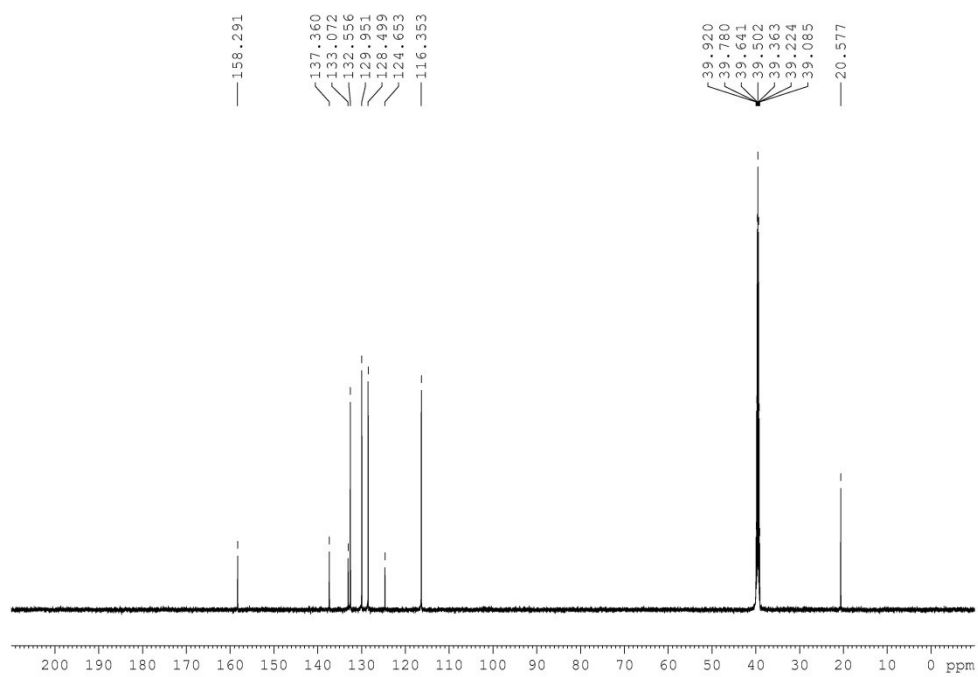

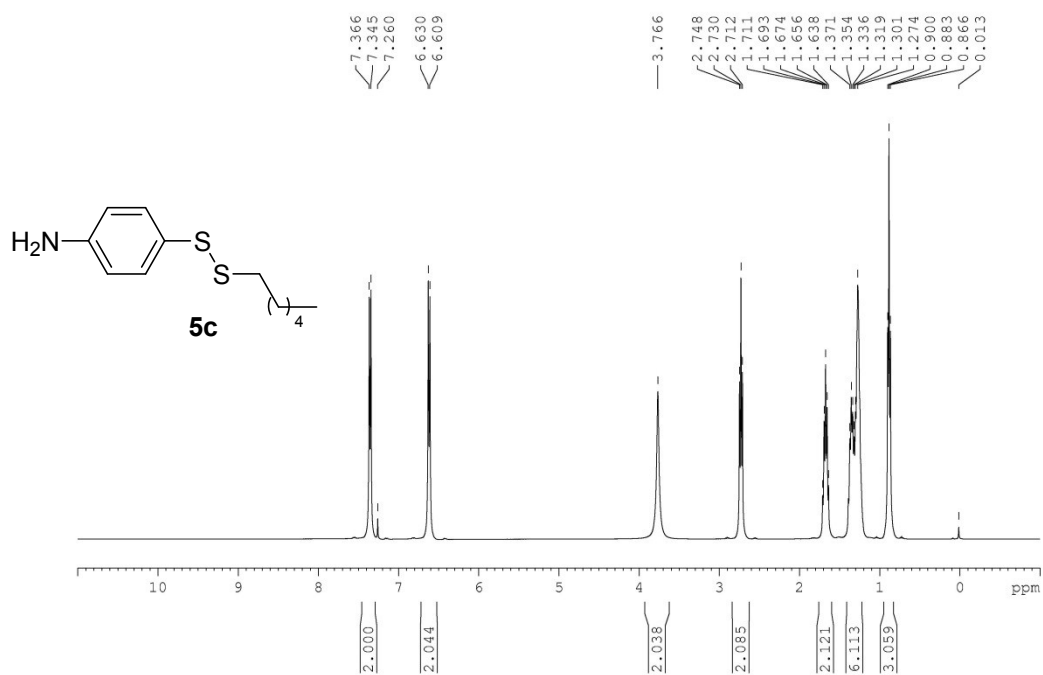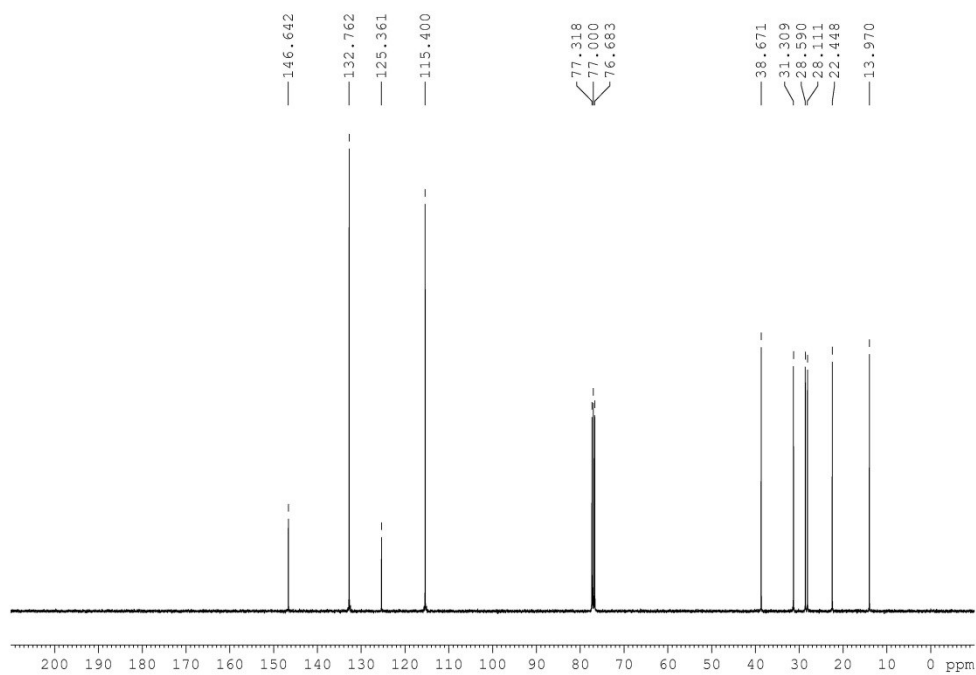

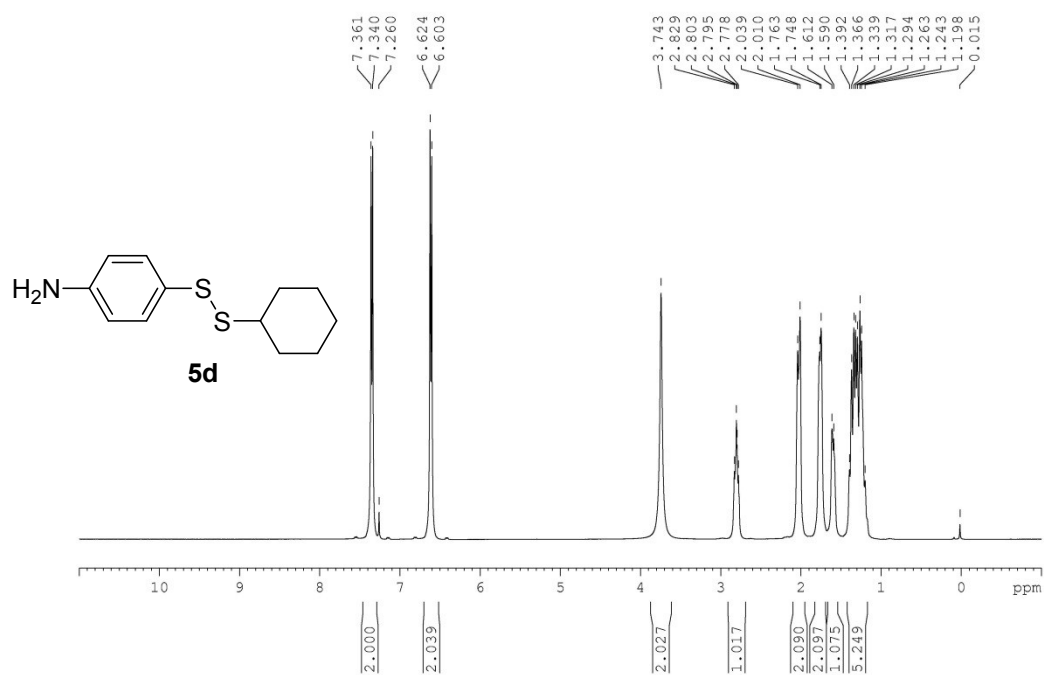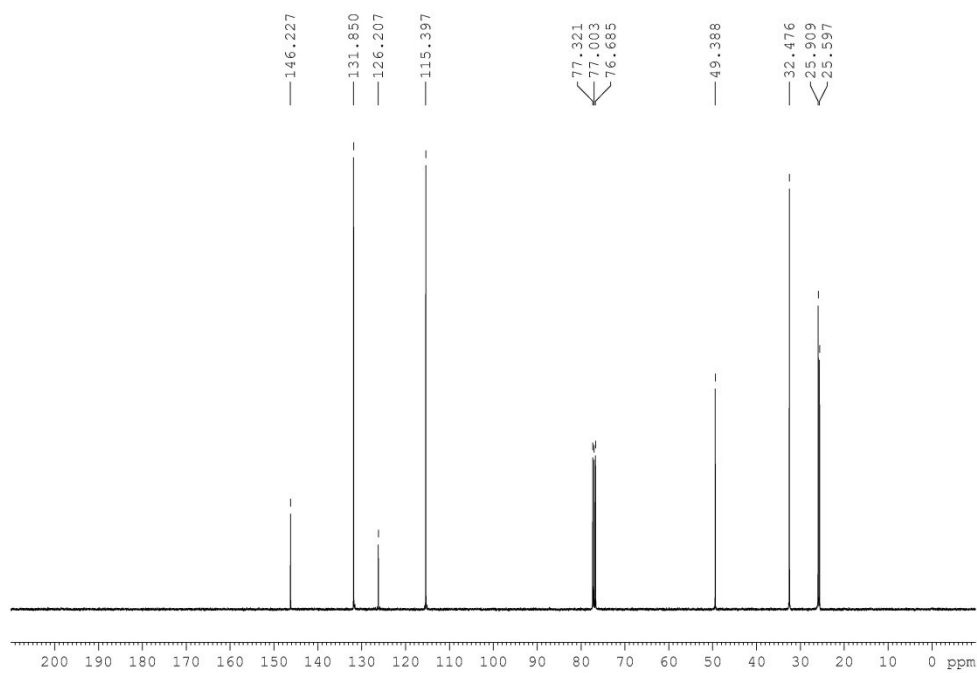

Supplement: c7gc00401j1.pdf [file c7gc00401j1.pdf]
